# Supplementary material
Source: PubMed Central journal article supplement (PMC3781983)
Supplement: 8a0011aefb06b100d262a218accfa1e1_genetics.113.154351-1.pdf [file 8a0011aefb06b100d262a218accfa1e1_genetics.113.154351-1.pdf]

## File S1: Supporting Data

### I. QTL Analysis

Result of MIM analysis for Model 1 of Trait 1

71450316 -filetype MImapqtl.out

QTL Cartographer v. 1.15c, May 2001

This output file (mimrltM.txt) was created by MIMapQTL...

It is 22:58:16 on Tuesday, 05 March 2013

#####

The Initial Model is

```
-trait      1   Analyzed trait [trait]
-maxqtl    18   Maximum number of allowed QTL in the model
-maxepis   36   Maximum number of epistatic terms allowed
-xic       1   Code for the IC criterion
-walk      1.0  Walking speed for position refinement and QTL search, in cM
-LRthresh  0.0  Likelihood ratio threshold for adding/deleting a QTL
-workcode  sMPrtseC   Code indicating what to do
-modelfile qtlcarti.mqt
```

```
-Aqtl      5   Number of QTL with additive effects
-Dqtl      0   Number of QTL with dominance effects
-AAqtl     0   Number of QTL with additive by additive effects
-ADqtl     0   Number of QTL with additive by dominance effects
-DAqtl     0   Number of QTL with dominance by additive effects
-DDqtl     0   Number of QTL with dominance by dominance effects
```

```
-Total     5   Number of parameters in this model
-Maximum   19  Number of parameters allowed in this model (2sqrt(n))
```

Here is a summary of the QTL

Note: c1 <c2> - Recombinant frequency between QTL and adjacency marker of left <right>

| QTL | Effect | Value    | Position (Main effect) |    |            |            | Epistatic effect Position |     |     |      |      |  |
|-----|--------|----------|------------------------|----|------------|------------|---------------------------|-----|-----|------|------|--|
|     |        |          | C                      | M  | c1         | c2         | (QTL)                     | (C) | (M) | (c1) | (c2) |  |
| -s  |        |          |                        |    |            |            |                           |     |     |      |      |  |
| 1   | A      | 49.1234  | 1                      | 10 | 0.05662800 | 0.00329000 |                           |     |     |      |      |  |
| 2   | A      | -46.0581 | 3                      | 8  | 0.00100000 | 0.04531300 |                           |     |     |      |      |  |
| 3   | A      | 56.5110  | 4                      | 22 | 0.04767200 | 0.00754200 |                           |     |     |      |      |  |
| 4   | A      | -77.2541 | 5                      | 18 | 0.01960600 | 0.01224700 |                           |     |     |      |      |  |
| 5   | A      | 88.2851  | 5                      | 19 | 0.00100000 | 0.02561900 |                           |     |     |      |      |  |
| -e  |        |          |                        |    |            |            |                           |     |     |      |      |  |

#####

After PARAMETER refinement,

```

-trait      1   Analyzed trait [trait]
-maxqtl    18   Maximum number of allowed QTL in the model
-maxepis   36   Maximum number of epistatic terms allowed
-xic       1   Code for the IC criterion
-walk      1.0  Walking speed for position refinement and QTL search, in cM
-LRthresh  0.0  Likelihood ratio threshold for adding/deleting a QTL
-workcode  sMPrtseC  Code indicating what to do
-modelfile qtlcarti.mqt

```

```

-Aqtl     5   Number of QTL with additive effects
-Dqtl     0   Number of QTL with dominance effects
-AAqtl    0   Number of QTL with additive by additive effects
-ADqtl    0   Number of QTL with additive by dominance effects
-DAqtl    0   Number of QTL with dominance by additive effects
-DDqtl    0   Number of QTL with dominance by dominance effects

```

```

-Total     5   Number of parameters in this model
-Maximum   19  Number of parameters allowed in this model (2sqrt(n))

```

Here is a summary of the QTL

Note: c1 <c2> - Recombinant frequency between QTL and adjacence marker of left <right>

| QTL | Effect | Value    | Position (Main effect) |    |            |            | Epistatic effect Position |     |      |      |  |
|-----|--------|----------|------------------------|----|------------|------------|---------------------------|-----|------|------|--|
|     |        |          | C                      | M  | c1         | c2         | (QTL) (C)                 | (M) | (c1) | (c2) |  |
| -s  |        |          |                        |    |            |            |                           |     |      |      |  |
| 1   | A      | 21.6663  | 1                      | 10 | 0.05662800 | 0.00329000 |                           |     |      |      |  |
| 2   | A      | -18.1787 | 3                      | 8  | 0.00100000 | 0.04531300 |                           |     |      |      |  |
| 3   | A      | 21.6842  | 4                      | 22 | 0.04767200 | 0.00754200 |                           |     |      |      |  |
| 4   | A      | -58.2673 | 5                      | 18 | 0.01960600 | 0.01224700 |                           |     |      |      |  |
| 5   | A      | 63.6223  | 5                      | 19 | 0.00100000 | 0.02561900 |                           |     |      |      |  |

-e

#####

We use this model for the Variance-Covariance matrix.

```

-trait      1   Analyzed trait [trait]
-maxqtl    18   Maximum number of allowed QTL in the model
-maxepis   36   Maximum number of epistatic terms allowed
-xic       1   Code for the IC criterion
-walk      1.0  Walking speed for position refinement and QTL search, in cM
-LRthresh  0.0  Likelihood ratio threshold for adding/deleting a QTL
-workcode  sMPrtseC  Code indicating what to do
-modelfile qtlcarti.mqt

```

-Aqtl 5 Number of QTL with additive effects  
 -Dqtl 0 Number of QTL with dominance effects  
 -AAqtl 0 Number of QTL with additive by additive effects  
 -ADqtl 0 Number of QTL with additive by dominance effects  
 -DAqtl 0 Number of QTL with dominance by additive effects  
 -DDqtl 0 Number of QTL with dominance by dominance effects

-Total 5 Number of parameters in this model  
 -Maximum 19 Number of parameters allowed in this model (2sqrt(n))

Here is a summary of the QTL  
 Note: c1 <c2> - Recombinant frequency between QTL and adjacency marker of left <right>

| QTL Effect | Position (Main effect) |   |    |            |            | Epistatic effect Position |     |     |      |      |
|------------|------------------------|---|----|------------|------------|---------------------------|-----|-----|------|------|
|            | Value                  | C | M  | c1         | c2         | (QTL)                     | (C) | (M) | (c1) | (c2) |
| -s         |                        |   |    |            |            |                           |     |     |      |      |
| 1 A        | 21.6663                | 1 | 10 | 0.05662800 | 0.00329000 |                           |     |     |      |      |
| 2 A        | -18.1787               | 3 | 8  | 0.00100000 | 0.04531300 |                           |     |     |      |      |
| 3 A        | 21.6842                | 4 | 22 | 0.04767200 | 0.00754200 |                           |     |     |      |      |
| 4 A        | -58.2673               | 5 | 18 | 0.01960600 | 0.01224700 |                           |     |     |      |      |
| 5 A        | 63.6223                | 5 | 19 | 0.00100000 | 0.02561900 |                           |     |     |      |      |

-e  
 #####  
 This is the Variance-Covariance Matrix.

Phenotypic Variance: 4901  
 Genetic Variance: 3664  
 Residual Variance: 1236

| QTL(s) Type | 1     | 2      | 3      | 4     | 5      |
|-------------|-------|--------|--------|-------|--------|
| 1 A         | 469.3 | -98.48 | 28.36  | 8.37  | 237.1  |
| 2 A         |       | 330.1  | -7.186 | 228.1 | -388.3 |
| 3 A         |       |        | 469.1  | 147.6 | -114.6 |
| 4 A         |       |        |        | 3378  | -4930  |
| 5 A         |       |        |        |       | 3906   |
| Sum         | 557   | 197.2  | 496.2  | 1105  | 1309   |
| Total       | 3664  |        |        |       |        |

.....  
 Here are the R2 values

Genetic: 0.7477

Residual: 0.2523

| QTL(s) | Type | 1      | 2       | 3       | 4      | 5       |
|--------|------|--------|---------|---------|--------|---------|
| 1      | A    | 0.0958 | -0.0201 | 0.0058  | 0.0017 | 0.0484  |
| 2      | A    |        | 0.0674  | -0.0015 | 0.0466 | -0.0792 |
| 3      | A    |        |         | 0.0957  | 0.0301 | -0.0234 |
| 4      | A    |        |         |         | 0.6893 | -1.0059 |
| 5      | A    |        |         |         |        | 0.7971  |
| Sum    |      | 0.1137 | 0.0402  | 0.1013  | 0.2255 | 0.2670  |
| Total  |      | 0.7477 |         |         |        |         |

\*\*\*\*\*

Estimates of QTL positions, effects and interactions

| QTL(pair) | Type | Chrom. | Marker | Position | LOD  | Effect   | Effect (%) |
|-----------|------|--------|--------|----------|------|----------|------------|
| 1         | A    | 1      | 10     | 48.9199  | 2.76 | 21.6663  | 11.4       |
| 2         | A    | 3      | 8      | 28.5101  | 2.25 | -18.1787 | 4.0        |
| 3         | A    | 4      | 22     | 100.9100 | 3.05 | 21.6842  | 10.1       |
| 4         | A    | 5      | 18     | 67.1601  | 1.96 | -58.2673 | 22.6       |
| 5         | A    | 5      | 19     | 68.5001  | 3.41 | 63.6223  | 26.7       |

These are the breeding values of the individuals.

| Individual | Equation 14 | Equation 15 |
|------------|-------------|-------------|
| 1          | -108.1162   | -45.9587    |
| 2          | 56.0318     | 15.9832     |
| 3          | 74.7818     | 14.8005     |
| 4          | 65.3369     | 66.2320     |
| 5          | 42.5712     | 12.2108     |
| 6          | 35.3581     | 39.6197     |
| 7          | 117.5375    | 0.0564      |
| 8          | 20.8846     | 67.0736     |
| 9          | 11.4620     | 16.1371     |
| 10         | 30.2853     | 17.6694     |
| 11         | 38.5752     | 40.2654     |
| 12         | 54.7789     | 85.9728     |
| 13         | 183.0493    | 109.9992    |
| 14         | 75.1014     | 0.7822      |
| 15         | 39.3201     | -3.7158     |

|    |          |          |
|----|----------|----------|
| 16 | 67.7519  | 67.7758  |
| 17 | 58.9501  | 80.2842  |
| 18 | 169.3721 | 23.1663  |
| 19 | -31.4108 | -69.1495 |
| 20 | 67.6778  | 107.5116 |
| 21 | -21.3201 | 28.4675  |
| 22 | 57.2362  | 45.9443  |
| 23 | 47.1255  | -23.9477 |
| 24 | 62.2847  | 99.6097  |
| 25 | 3.2780   | 39.5434  |
| 26 | 48.8415  | 43.6531  |
| 27 | -28.9091 | -72.0085 |
| 28 | -14.0556 | 24.1166  |
| 29 | 6.6778   | 6.5722   |
| 30 | 36.4544  | 17.7909  |
| 31 | 55.7960  | 57.7139  |
| 32 | -14.9711 | -31.6804 |
| 33 | 63.3501  | 35.1051  |
| 34 | 30.1880  | 55.3054  |
| 35 | 24.5452  | 69.4538  |
| 36 | 0.0227   | 2.5632   |
| 37 | 7.2866   | 11.1554  |
| 38 | -74.0114 | -16.4867 |
| 39 | 88.5096  | 52.8547  |
| 40 | 29.6563  | 41.5370  |
| 41 | 95.8859  | 83.7961  |
| 42 | 1.8184   | 14.0665  |
| 43 | 43.5952  | 30.4732  |
| 44 | 80.0895  | 81.8627  |
| 45 | -96.0828 | -11.6944 |
| 46 | 93.1192  | 94.1341  |
| 47 | 46.2224  | 59.5988  |
| 48 | 6.3933   | 12.9213  |
| 49 | 90.9432  | 47.1804  |
| 50 | 16.0498  | 21.0818  |
| 51 | 16.0642  | 23.4472  |
| 52 | 17.2377  | 33.5381  |
| 53 | 30.5482  | 62.7538  |
| 54 | 13.9164  | 18.8401  |
| 55 | -14.3917 | -14.0593 |
| 56 | 32.4041  | -14.4069 |
| 57 | 30.9462  | 25.8180  |
| 58 | -81.4133 | -26.4686 |
| 59 | 62.4313  | 33.6639  |
| 60 | 28.1634  | -34.8551 |
| 61 | 54.5752  | 5.8643   |

|    |           |          |
|----|-----------|----------|
| 62 | -17.0297  | -20.7719 |
| 63 | 1.9633    | 5.2396   |
| 64 | 27.5334   | 33.0489  |
| 65 | 58.7193   | 61.0769  |
| 66 | -115.0340 | -32.4583 |
| 67 | 79.0594   | 94.0740  |
| 68 | 60.2534   | 23.1922  |
| 69 | 42.0166   | 37.6528  |
| 70 | 41.8056   | -10.3027 |
| 71 | 46.9872   | 6.7104   |
| 72 | 63.1472   | 110.7074 |
| 73 | 8.6213    | 11.3527  |
| 74 | 36.8359   | 46.0165  |
| 75 | 51.1000   | 49.2893  |
| 76 | 74.4380   | 66.7694  |
| 77 | 26.5311   | 32.9470  |
| 78 | 9.4383    | 54.1679  |
| 79 | 35.6732   | 94.9896  |
| 80 | 50.5226   | 4.9794   |
| 81 | 22.3130   | 34.8999  |
| 82 | 48.4159   | 34.3798  |
| 83 | 13.1523   | -23.6851 |
| 84 | -0.6919   | 6.3906   |
| 85 | -70.2524  | -6.0560  |
| 86 | -17.5487  | 0.1258   |
| 87 | -145.7010 | -53.0890 |
| 88 | 88.7238   | 39.7092  |
| 89 | 60.3896   | 56.1905  |
| 90 | 51.6220   | 37.9031  |
| 91 | 96.4155   | 90.3001  |
| 92 | -3.5232   | -1.5387  |
| 93 | -65.9182  | 10.3026  |
| 94 | 34.2078   | 28.1844  |
| 95 | 167.0550  | 83.2006  |
| 96 | 40.8446   | 49.5807  |
| 97 | -123.1481 | -48.1993 |
| 98 | 65.7914   | 73.1303  |

-----

These are the QTL genotype and probability values of the individuals.

-----

| Individual | GID | QTL Genotype | Probability |
|------------|-----|--------------|-------------|
|------------|-----|--------------|-------------|

---

|      |    |       |        |
|------|----|-------|--------|
| 0001 | 01 | 11111 | 0.2414 |
| 0001 | 02 | 11112 | 0.0022 |
| 0001 | 03 | 11121 | 0.1519 |
| 0001 | 04 | 11122 | 0.0014 |
| 0001 | 05 | 11211 | 0.0656 |
| 0001 | 06 | 11221 | 0.0412 |
| 0001 | 07 | 12111 | 0.2346 |
| 0001 | 08 | 12112 | 0.0021 |
| 0001 | 09 | 12121 | 0.1476 |
| 0001 | 10 | 12122 | 0.0013 |
| 0001 | 11 | 12211 | 0.0637 |
| 0001 | 12 | 12221 | 0.0401 |
| 0001 | 13 | 21111 | 0.0021 |
| 0001 | 14 | 21121 | 0.0013 |
| 0001 | 15 | 22111 | 0.0020 |
| 0001 | 16 | 22121 | 0.0013 |
| 0002 | 01 | 11111 | 0.0014 |
| 0002 | 02 | 21111 | 0.5060 |
| 0002 | 03 | 21112 | 0.0202 |
| 0002 | 04 | 21121 | 0.3184 |
| 0002 | 05 | 21122 | 0.0127 |
| 0002 | 06 | 21211 | 0.0833 |
| 0002 | 07 | 21212 | 0.0033 |
| 0002 | 08 | 21221 | 0.0524 |
| 0002 | 09 | 21222 | 0.0021 |
| 0003 | 01 | 11111 | 0.1056 |
| 0003 | 02 | 11112 | 0.0042 |
| 0003 | 03 | 11121 | 0.0665 |
| 0003 | 04 | 11122 | 0.0027 |
| 0003 | 05 | 11211 | 0.1056 |
| 0003 | 06 | 11212 | 0.0042 |
| 0003 | 07 | 11221 | 0.0665 |
| 0003 | 08 | 11222 | 0.0027 |
| 0003 | 09 | 12111 | 0.0024 |
| 0003 | 10 | 12121 | 0.0015 |
| 0003 | 11 | 12211 | 0.0024 |
| 0003 | 12 | 12221 | 0.0015 |
| 0003 | 13 | 21111 | 0.1831 |
| 0003 | 14 | 21112 | 0.0073 |
| 0003 | 15 | 21121 | 0.1152 |
| 0003 | 16 | 21122 | 0.0046 |
| 0003 | 17 | 21211 | 0.1831 |
| 0003 | 18 | 21212 | 0.0073 |
| 0003 | 19 | 21221 | 0.1152 |
| 0003 | 20 | 21222 | 0.0046 |

|      |    |       |        |
|------|----|-------|--------|
| 0003 | 21 | 22111 | 0.0042 |
| 0003 | 22 | 22121 | 0.0027 |
| 0003 | 23 | 22211 | 0.0042 |
| 0003 | 24 | 22221 | 0.0027 |
| 0004 | 01 | 11122 | 0.0023 |
| 0004 | 02 | 21112 | 0.0031 |
| 0004 | 03 | 21122 | 0.8347 |
| 0004 | 04 | 21222 | 0.1374 |
| 0004 | 05 | 22122 | 0.0192 |
| 0004 | 06 | 22222 | 0.0032 |
| 0005 | 01 | 11111 | 0.0016 |
| 0005 | 02 | 21111 | 0.5567 |
| 0005 | 03 | 21112 | 0.0223 |
| 0005 | 04 | 21121 | 0.3503 |
| 0005 | 05 | 21122 | 0.0140 |
| 0005 | 06 | 21211 | 0.0330 |
| 0005 | 07 | 21212 | 0.0013 |
| 0005 | 08 | 21221 | 0.0208 |
| 0006 | 01 | 12211 | 0.0024 |
| 0006 | 02 | 22111 | 0.0046 |
| 0006 | 03 | 22211 | 0.8465 |
| 0006 | 04 | 22221 | 0.1465 |
| 0007 | 01 | 12111 | 0.1134 |
| 0007 | 02 | 12112 | 0.1180 |
| 0007 | 03 | 12121 | 0.1175 |
| 0007 | 04 | 12122 | 0.1223 |
| 0007 | 05 | 12211 | 0.1134 |
| 0007 | 06 | 12212 | 0.1180 |
| 0007 | 07 | 12221 | 0.1175 |
| 0007 | 08 | 12222 | 0.1223 |
| 0007 | 09 | 22111 | 0.0069 |
| 0007 | 10 | 22112 | 0.0072 |
| 0007 | 11 | 22121 | 0.0072 |
| 0007 | 12 | 22122 | 0.0075 |
| 0007 | 13 | 22211 | 0.0069 |
| 0007 | 14 | 22212 | 0.0072 |
| 0007 | 15 | 22221 | 0.0072 |
| 0007 | 16 | 22222 | 0.0075 |
| 0008 | 01 | 12112 | 0.0222 |
| 0008 | 02 | 12122 | 0.0352 |
| 0008 | 03 | 22112 | 0.3621 |
| 0008 | 04 | 22122 | 0.5754 |
| 0008 | 05 | 22212 | 0.0020 |
| 0008 | 06 | 22222 | 0.0031 |
| 0009 | 01 | 11112 | 0.0042 |
| 0009 | 02 | 11122 | 0.3113 |



|      |    |       |        |
|------|----|-------|--------|
| 0009 | 03 | 11212 | 0.0024 |
| 0009 | 04 | 11222 | 0.1756 |
| 0009 | 05 | 12112 | 0.0043 |
| 0009 | 06 | 12122 | 0.3195 |
| 0009 | 07 | 12212 | 0.0024 |
| 0009 | 08 | 12222 | 0.1802 |
| 0010 | 01 | 11121 | 0.0093 |
| 0010 | 02 | 11122 | 0.2319 |
| 0010 | 03 | 11221 | 0.0093 |
| 0010 | 04 | 11222 | 0.2319 |
| 0010 | 05 | 12121 | 0.0093 |
| 0010 | 06 | 12122 | 0.2319 |
| 0010 | 07 | 12221 | 0.0093 |
| 0010 | 08 | 12222 | 0.2319 |
| 0010 | 09 | 21122 | 0.0088 |
| 0010 | 10 | 21222 | 0.0088 |
| 0010 | 11 | 22122 | 0.0088 |
| 0010 | 12 | 22222 | 0.0088 |
| 0011 | 01 | 11122 | 0.0024 |
| 0011 | 02 | 11212 | 0.0017 |
| 0011 | 03 | 11221 | 0.0179 |
| 0011 | 04 | 11222 | 0.4472 |
| 0011 | 05 | 12122 | 0.0025 |
| 0011 | 06 | 12212 | 0.0017 |
| 0011 | 07 | 12221 | 0.0181 |
| 0011 | 08 | 12222 | 0.4514 |
| 0011 | 09 | 21221 | 0.0011 |
| 0011 | 10 | 21222 | 0.0274 |
| 0011 | 11 | 22221 | 0.0011 |
| 0011 | 12 | 22222 | 0.0276 |
| 0012 | 01 | 21111 | 0.0032 |
| 0012 | 02 | 21112 | 0.0809 |
| 0012 | 03 | 21121 | 0.0051 |
| 0012 | 04 | 21122 | 0.1285 |
| 0012 | 05 | 21211 | 0.0011 |
| 0012 | 06 | 21212 | 0.0273 |
| 0012 | 07 | 21221 | 0.0017 |
| 0012 | 08 | 21222 | 0.0434 |
| 0012 | 09 | 22111 | 0.0079 |
| 0012 | 10 | 22112 | 0.1968 |
| 0012 | 11 | 22121 | 0.0125 |
| 0012 | 12 | 22122 | 0.3128 |
| 0012 | 13 | 22211 | 0.0027 |
| 0012 | 14 | 22212 | 0.0664 |
| 0012 | 15 | 22221 | 0.0042 |
| 0012 | 16 | 22222 | 0.1055 |

|      |    |       |        |
|------|----|-------|--------|
| 0013 | 01 | 12212 | 0.0222 |
| 0013 | 02 | 12222 | 0.0352 |
| 0013 | 03 | 22112 | 0.0020 |
| 0013 | 04 | 22122 | 0.0031 |
| 0013 | 05 | 22212 | 0.3621 |
| 0013 | 06 | 22222 | 0.5754 |
| 0014 | 01 | 12111 | 0.0999 |
| 0014 | 02 | 12112 | 0.1181 |
| 0014 | 03 | 12121 | 0.1160 |
| 0014 | 04 | 12122 | 0.1372 |
| 0014 | 05 | 12211 | 0.0999 |
| 0014 | 06 | 12212 | 0.1181 |
| 0014 | 07 | 12221 | 0.1160 |
| 0014 | 08 | 12222 | 0.1372 |
| 0014 | 09 | 22111 | 0.0061 |
| 0014 | 10 | 22112 | 0.0072 |
| 0014 | 11 | 22121 | 0.0071 |
| 0014 | 12 | 22122 | 0.0084 |
| 0014 | 13 | 22211 | 0.0061 |
| 0014 | 14 | 22212 | 0.0072 |
| 0014 | 15 | 22221 | 0.0071 |
| 0014 | 16 | 22222 | 0.0084 |
| 0015 | 01 | 11211 | 0.0086 |
| 0015 | 02 | 11221 | 0.0054 |
| 0015 | 03 | 12111 | 0.0015 |
| 0015 | 04 | 12211 | 0.2833 |
| 0015 | 05 | 12212 | 0.0113 |
| 0015 | 06 | 12221 | 0.1782 |
| 0015 | 07 | 12222 | 0.0071 |
| 0015 | 08 | 21211 | 0.0087 |
| 0015 | 09 | 21221 | 0.0055 |
| 0015 | 10 | 22111 | 0.0016 |
| 0015 | 11 | 22211 | 0.2884 |
| 0015 | 12 | 22212 | 0.0115 |
| 0015 | 13 | 22221 | 0.1815 |
| 0015 | 14 | 22222 | 0.0073 |
| 0016 | 01 | 12222 | 0.0028 |
| 0016 | 02 | 22122 | 0.0054 |
| 0016 | 03 | 22212 | 0.0037 |
| 0016 | 04 | 22222 | 0.9882 |
| 0017 | 01 | 21211 | 0.0947 |
| 0017 | 02 | 21212 | 0.1210 |
| 0017 | 03 | 21221 | 0.1248 |
| 0017 | 04 | 21222 | 0.1595 |
| 0017 | 05 | 22211 | 0.0947 |
| 0017 | 06 | 22212 | 0.1210 |

|      |    |       |        |
|------|----|-------|--------|
| 0017 | 07 | 22221 | 0.1248 |
| 0017 | 08 | 22222 | 0.1595 |
| 0018 | 01 | 11112 | 0.0032 |
| 0018 | 02 | 11122 | 0.2352 |
| 0018 | 03 | 11222 | 0.0226 |
| 0018 | 04 | 12112 | 0.0035 |
| 0018 | 05 | 12122 | 0.2576 |
| 0018 | 06 | 12222 | 0.0247 |
| 0018 | 07 | 21112 | 0.0026 |
| 0018 | 08 | 21122 | 0.1950 |
| 0018 | 09 | 21222 | 0.0187 |
| 0018 | 10 | 22112 | 0.0029 |
| 0018 | 11 | 22122 | 0.2135 |
| 0018 | 12 | 22222 | 0.0205 |
| 0019 | 01 | 12111 | 0.5798 |
| 0019 | 02 | 12112 | 0.0232 |
| 0019 | 03 | 12121 | 0.3649 |
| 0019 | 04 | 12122 | 0.0146 |
| 0019 | 05 | 12211 | 0.0032 |
| 0019 | 06 | 12221 | 0.0020 |
| 0019 | 07 | 22111 | 0.0076 |
| 0019 | 08 | 22121 | 0.0048 |
| 0020 | 01 | 12212 | 0.0010 |
| 0020 | 02 | 12222 | 0.0016 |
| 0020 | 03 | 22112 | 0.0020 |
| 0020 | 04 | 22122 | 0.0032 |
| 0020 | 05 | 22211 | 0.0147 |
| 0020 | 06 | 22212 | 0.3684 |
| 0020 | 07 | 22221 | 0.0234 |
| 0020 | 08 | 22222 | 0.5855 |
| 0021 | 01 | 11222 | 0.0012 |
| 0021 | 02 | 12111 | 0.0019 |
| 0021 | 03 | 12112 | 0.0028 |
| 0021 | 04 | 12121 | 0.0061 |
| 0021 | 05 | 12122 | 0.0090 |
| 0021 | 06 | 12211 | 0.0033 |
| 0021 | 07 | 12212 | 0.0048 |
| 0021 | 08 | 12221 | 0.0103 |
| 0021 | 09 | 12222 | 0.0152 |
| 0021 | 10 | 21111 | 0.0026 |
| 0021 | 11 | 21112 | 0.0038 |
| 0021 | 12 | 21121 | 0.0081 |
| 0021 | 13 | 21122 | 0.0119 |
| 0021 | 14 | 21211 | 0.0043 |
| 0021 | 15 | 21212 | 0.0064 |
| 0021 | 16 | 21221 | 0.0137 |

|      |    |       |        |
|------|----|-------|--------|
| 0021 | 17 | 21222 | 0.0202 |
| 0021 | 18 | 22111 | 0.0316 |
| 0021 | 19 | 22112 | 0.0465 |
| 0021 | 20 | 22121 | 0.0997 |
| 0021 | 21 | 22122 | 0.1469 |
| 0021 | 22 | 22211 | 0.0534 |
| 0021 | 23 | 22212 | 0.0787 |
| 0021 | 24 | 22221 | 0.1688 |
| 0021 | 25 | 22222 | 0.2487 |
| 0022 | 01 | 11111 | 0.0052 |
| 0022 | 02 | 11112 | 0.0522 |
| 0022 | 03 | 11121 | 0.0339 |
| 0022 | 04 | 11122 | 0.3394 |
| 0022 | 05 | 11211 | 0.0062 |
| 0022 | 06 | 11212 | 0.0625 |
| 0022 | 07 | 11221 | 0.0406 |
| 0022 | 08 | 11222 | 0.4064 |
| 0022 | 09 | 12112 | 0.0012 |
| 0022 | 10 | 12122 | 0.0078 |
| 0022 | 11 | 12212 | 0.0014 |
| 0022 | 12 | 12222 | 0.0094 |
| 0022 | 13 | 21112 | 0.0019 |
| 0022 | 14 | 21121 | 0.0012 |
| 0022 | 15 | 21122 | 0.0122 |
| 0022 | 16 | 21212 | 0.0022 |
| 0022 | 17 | 21221 | 0.0015 |
| 0022 | 18 | 21222 | 0.0146 |
| 0023 | 01 | 11111 | 0.4110 |
| 0023 | 02 | 11121 | 0.2586 |
| 0023 | 03 | 11211 | 0.0022 |
| 0023 | 04 | 11221 | 0.0014 |
| 0023 | 05 | 21111 | 0.1999 |
| 0023 | 06 | 21121 | 0.1258 |
| 0023 | 07 | 21211 | 0.0011 |
| 0024 | 01 | 11112 | 0.0545 |
| 0024 | 02 | 11122 | 0.0866 |
| 0024 | 03 | 11212 | 0.3311 |
| 0024 | 04 | 11222 | 0.5262 |
| 0024 | 05 | 21222 | 0.0015 |
| 0025 | 01 | 11111 | 0.0074 |
| 0025 | 02 | 11112 | 0.1847 |
| 0025 | 03 | 11121 | 0.0117 |
| 0025 | 04 | 11122 | 0.2935 |
| 0025 | 05 | 11212 | 0.0010 |
| 0025 | 06 | 11222 | 0.0016 |
| 0025 | 07 | 12111 | 0.0074 |

|      |    |       |        |
|------|----|-------|--------|
| 0025 | 08 | 12112 | 0.1847 |
| 0025 | 09 | 12121 | 0.0117 |
| 0025 | 10 | 12122 | 0.2935 |
| 0025 | 11 | 12212 | 0.0010 |
| 0025 | 12 | 12222 | 0.0016 |
| 0026 | 01 | 11111 | 0.1406 |
| 0026 | 02 | 11211 | 0.8539 |
| 0026 | 03 | 11221 | 0.0032 |
| 0026 | 04 | 21211 | 0.0024 |
| 0027 | 01 | 12111 | 0.5754 |
| 0027 | 02 | 12121 | 0.3621 |
| 0027 | 03 | 12211 | 0.0031 |
| 0027 | 04 | 12221 | 0.0020 |
| 0027 | 05 | 22111 | 0.0352 |
| 0027 | 06 | 22121 | 0.0222 |
| 0028 | 01 | 11111 | 0.0251 |
| 0028 | 02 | 11112 | 0.0193 |
| 0028 | 03 | 11121 | 0.0501 |
| 0028 | 04 | 11122 | 0.0387 |
| 0028 | 05 | 11211 | 0.1522 |
| 0028 | 06 | 11212 | 0.1175 |
| 0028 | 07 | 11221 | 0.3045 |
| 0028 | 08 | 11222 | 0.2350 |
| 0028 | 09 | 21111 | 0.0015 |
| 0028 | 10 | 21112 | 0.0012 |
| 0028 | 11 | 21121 | 0.0031 |
| 0028 | 12 | 21122 | 0.0024 |
| 0028 | 13 | 21211 | 0.0093 |
| 0028 | 14 | 21212 | 0.0072 |
| 0028 | 15 | 21221 | 0.0186 |
| 0028 | 16 | 21222 | 0.0144 |
| 0029 | 01 | 11111 | 0.9882 |
| 0029 | 02 | 11121 | 0.0037 |
| 0029 | 03 | 11211 | 0.0054 |
| 0029 | 04 | 21111 | 0.0028 |
| 0030 | 01 | 11111 | 0.0397 |
| 0030 | 02 | 11121 | 0.0250 |
| 0030 | 03 | 11211 | 0.2411 |
| 0030 | 04 | 11221 | 0.1517 |
| 0030 | 05 | 12111 | 0.0034 |
| 0030 | 06 | 12121 | 0.0022 |
| 0030 | 07 | 12211 | 0.0208 |
| 0030 | 08 | 12221 | 0.0131 |
| 0030 | 09 | 21111 | 0.0402 |
| 0030 | 10 | 21121 | 0.0253 |
| 0030 | 11 | 21211 | 0.2441 |

|      |    |       |        |
|------|----|-------|--------|
| 0030 | 12 | 21221 | 0.1536 |
| 0030 | 13 | 22111 | 0.0035 |
| 0030 | 14 | 22121 | 0.0022 |
| 0030 | 15 | 22211 | 0.0210 |
| 0030 | 16 | 22221 | 0.0132 |
| 0031 | 01 | 12222 | 0.0014 |
| 0031 | 02 | 22111 | 0.0262 |
| 0031 | 03 | 22112 | 0.0380 |
| 0031 | 04 | 22121 | 0.0365 |
| 0031 | 05 | 22122 | 0.0529 |
| 0031 | 06 | 22211 | 0.1443 |
| 0031 | 07 | 22212 | 0.2089 |
| 0031 | 08 | 22221 | 0.2009 |
| 0031 | 09 | 22222 | 0.2909 |
| 0032 | 01 | 11111 | 0.0224 |
| 0032 | 02 | 11121 | 0.0141 |
| 0032 | 03 | 11211 | 0.0041 |
| 0032 | 04 | 11221 | 0.0026 |
| 0032 | 05 | 12111 | 0.1610 |
| 0032 | 06 | 12112 | 0.0064 |
| 0032 | 07 | 12121 | 0.1013 |
| 0032 | 08 | 12122 | 0.0041 |
| 0032 | 09 | 12211 | 0.0293 |
| 0032 | 10 | 12212 | 0.0012 |
| 0032 | 11 | 12221 | 0.0184 |
| 0032 | 12 | 21111 | 0.0388 |
| 0032 | 13 | 21112 | 0.0016 |
| 0032 | 14 | 21121 | 0.0244 |
| 0032 | 15 | 21211 | 0.0071 |
| 0032 | 16 | 21221 | 0.0044 |
| 0032 | 17 | 22111 | 0.2791 |
| 0032 | 18 | 22112 | 0.0112 |
| 0032 | 19 | 22121 | 0.1756 |
| 0032 | 20 | 22122 | 0.0070 |
| 0032 | 21 | 22211 | 0.0508 |
| 0032 | 22 | 22212 | 0.0020 |
| 0032 | 23 | 22221 | 0.0319 |
| 0032 | 24 | 22222 | 0.0013 |
| 0033 | 01 | 12221 | 0.0010 |
| 0033 | 02 | 21211 | 0.0042 |
| 0033 | 03 | 21212 | 0.0033 |
| 0033 | 04 | 21221 | 0.0084 |
| 0033 | 05 | 21222 | 0.0065 |
| 0033 | 06 | 22121 | 0.0020 |
| 0033 | 07 | 22122 | 0.0015 |
| 0033 | 08 | 22211 | 0.1830 |

|      |    |       |        |
|------|----|-------|--------|
| 0033 | 09 | 22212 | 0.1412 |
| 0033 | 10 | 22221 | 0.3661 |
| 0033 | 11 | 22222 | 0.2826 |
| 0034 | 01 | 12211 | 0.0023 |
| 0034 | 02 | 22111 | 0.1352 |
| 0034 | 03 | 22112 | 0.0054 |
| 0034 | 04 | 22211 | 0.8212 |
| 0034 | 05 | 22212 | 0.0328 |
| 0034 | 06 | 22221 | 0.0031 |
| 0035 | 01 | 12112 | 0.0011 |
| 0035 | 02 | 12122 | 0.0017 |
| 0035 | 03 | 22112 | 0.3831 |
| 0035 | 04 | 22122 | 0.6088 |
| 0035 | 05 | 22212 | 0.0021 |
| 0035 | 06 | 22222 | 0.0033 |
| 0036 | 01 | 12112 | 0.0058 |
| 0036 | 02 | 12121 | 0.0063 |
| 0036 | 03 | 12122 | 0.4861 |
| 0036 | 04 | 12212 | 0.0058 |
| 0036 | 05 | 12221 | 0.0063 |
| 0036 | 06 | 12222 | 0.4870 |
| 0036 | 07 | 22122 | 0.0014 |
| 0036 | 08 | 22222 | 0.0014 |
| 0037 | 01 | 11111 | 0.6103 |
| 0037 | 02 | 11112 | 0.0244 |
| 0037 | 03 | 11121 | 0.0798 |
| 0037 | 04 | 11122 | 0.0032 |
| 0037 | 05 | 11211 | 0.1005 |
| 0037 | 06 | 11212 | 0.0040 |
| 0037 | 07 | 11221 | 0.0131 |
| 0037 | 08 | 21111 | 0.1214 |
| 0037 | 09 | 21112 | 0.0049 |
| 0037 | 10 | 21121 | 0.0159 |
| 0037 | 11 | 21211 | 0.0200 |
| 0037 | 12 | 21221 | 0.0026 |
| 0038 | 01 | 11111 | 0.3597 |
| 0038 | 02 | 11112 | 0.0144 |
| 0038 | 03 | 11121 | 0.2263 |
| 0038 | 04 | 11122 | 0.0091 |
| 0038 | 05 | 11211 | 0.2299 |
| 0038 | 06 | 11212 | 0.0092 |
| 0038 | 07 | 11221 | 0.1447 |
| 0038 | 08 | 11222 | 0.0058 |
| 0038 | 09 | 21111 | 0.0010 |
| 0039 | 01 | 11211 | 0.0016 |
| 0039 | 02 | 11221 | 0.0010 |

|      |    |       |        |
|------|----|-------|--------|
| 0039 | 03 | 21111 | 0.0032 |
| 0039 | 04 | 21121 | 0.0020 |
| 0039 | 05 | 21211 | 0.5855 |
| 0039 | 06 | 21212 | 0.0234 |
| 0039 | 07 | 21221 | 0.3684 |
| 0039 | 08 | 21222 | 0.0147 |
| 0040 | 01 | 11111 | 0.0059 |
| 0040 | 02 | 11112 | 0.0028 |
| 0040 | 03 | 11121 | 0.0023 |
| 0040 | 04 | 11122 | 0.0011 |
| 0040 | 05 | 11211 | 0.2244 |
| 0040 | 06 | 11212 | 0.1065 |
| 0040 | 07 | 11221 | 0.0874 |
| 0040 | 08 | 11222 | 0.0415 |
| 0040 | 09 | 12111 | 0.0059 |
| 0040 | 10 | 12112 | 0.0028 |
| 0040 | 11 | 12121 | 0.0023 |
| 0040 | 12 | 12122 | 0.0011 |
| 0040 | 13 | 12211 | 0.2244 |
| 0040 | 14 | 12212 | 0.1065 |
| 0040 | 15 | 12221 | 0.0874 |
| 0040 | 16 | 12222 | 0.0415 |
| 0040 | 17 | 21211 | 0.0137 |
| 0040 | 18 | 21212 | 0.0065 |
| 0040 | 19 | 21221 | 0.0054 |
| 0040 | 20 | 21222 | 0.0025 |
| 0040 | 21 | 22211 | 0.0137 |
| 0040 | 22 | 22212 | 0.0065 |
| 0040 | 23 | 22221 | 0.0054 |
| 0040 | 24 | 22222 | 0.0025 |
| 0041 | 01 | 11122 | 0.0024 |
| 0041 | 02 | 11212 | 0.0016 |
| 0041 | 03 | 11222 | 0.4391 |
| 0041 | 04 | 12222 | 0.0101 |
| 0041 | 05 | 21122 | 0.0029 |
| 0041 | 06 | 21212 | 0.0020 |
| 0041 | 07 | 21222 | 0.5297 |
| 0041 | 08 | 22222 | 0.0122 |
| 0042 | 01 | 11111 | 0.1598 |
| 0042 | 02 | 11112 | 0.0340 |
| 0042 | 03 | 11121 | 0.0348 |
| 0042 | 04 | 11122 | 0.0074 |
| 0042 | 05 | 11211 | 0.1598 |
| 0042 | 06 | 11212 | 0.0340 |
| 0042 | 07 | 11221 | 0.0348 |
| 0042 | 08 | 11222 | 0.0074 |



|      |    |       |        |
|------|----|-------|--------|
| 0042 | 09 | 12111 | 0.1598 |
| 0042 | 10 | 12112 | 0.0340 |
| 0042 | 11 | 12121 | 0.0348 |
| 0042 | 12 | 12122 | 0.0074 |
| 0042 | 13 | 12211 | 0.1598 |
| 0042 | 14 | 12212 | 0.0340 |
| 0042 | 15 | 12221 | 0.0348 |
| 0042 | 16 | 12222 | 0.0074 |
| 0042 | 17 | 21111 | 0.0098 |
| 0042 | 18 | 21112 | 0.0021 |
| 0042 | 19 | 21121 | 0.0021 |
| 0042 | 20 | 21211 | 0.0098 |
| 0042 | 21 | 21212 | 0.0021 |
| 0042 | 22 | 21221 | 0.0021 |
| 0042 | 23 | 22111 | 0.0098 |
| 0042 | 24 | 22112 | 0.0021 |
| 0042 | 25 | 22121 | 0.0021 |
| 0042 | 26 | 22211 | 0.0098 |
| 0042 | 27 | 22212 | 0.0021 |
| 0042 | 28 | 22221 | 0.0021 |
| 0043 | 01 | 11122 | 0.0019 |
| 0043 | 02 | 11222 | 0.0118 |
| 0043 | 03 | 12121 | 0.0034 |
| 0043 | 04 | 12122 | 0.0841 |
| 0043 | 05 | 12212 | 0.0019 |
| 0043 | 06 | 12221 | 0.0204 |
| 0043 | 07 | 12222 | 0.5106 |
| 0043 | 08 | 21122 | 0.0011 |
| 0043 | 09 | 21222 | 0.0068 |
| 0043 | 10 | 22121 | 0.0019 |
| 0043 | 11 | 22122 | 0.0485 |
| 0043 | 12 | 22212 | 0.0011 |
| 0043 | 13 | 22221 | 0.0118 |
| 0043 | 14 | 22222 | 0.2946 |
| 0044 | 01 | 11122 | 0.0014 |
| 0044 | 02 | 11222 | 0.0014 |
| 0044 | 03 | 21112 | 0.0018 |
| 0044 | 04 | 21122 | 0.4856 |
| 0044 | 05 | 21212 | 0.0018 |
| 0044 | 06 | 21222 | 0.4856 |
| 0044 | 07 | 22122 | 0.0112 |
| 0044 | 08 | 22222 | 0.0112 |
| 0045 | 01 | 11111 | 0.2822 |
| 0045 | 02 | 11112 | 0.0059 |
| 0045 | 03 | 11121 | 0.1776 |
| 0045 | 04 | 11122 | 0.0037 |

|      |    |       |        |
|------|----|-------|--------|
| 0045 | 05 | 11211 | 0.2838 |
| 0045 | 06 | 11212 | 0.0059 |
| 0045 | 07 | 11221 | 0.1786 |
| 0045 | 08 | 11222 | 0.0037 |
| 0045 | 09 | 12111 | 0.0010 |
| 0045 | 10 | 12211 | 0.0010 |
| 0045 | 11 | 21111 | 0.0173 |
| 0045 | 12 | 21121 | 0.0109 |
| 0045 | 13 | 21211 | 0.0174 |
| 0045 | 14 | 21221 | 0.0109 |
| 0046 | 01 | 11111 | 0.0017 |
| 0046 | 02 | 11211 | 0.0334 |
| 0046 | 03 | 11212 | 0.0013 |
| 0046 | 04 | 21111 | 0.0454 |
| 0046 | 05 | 21112 | 0.0018 |
| 0046 | 06 | 21211 | 0.8779 |
| 0046 | 07 | 21212 | 0.0351 |
| 0046 | 08 | 21221 | 0.0033 |
| 0047 | 01 | 11111 | 0.0016 |
| 0047 | 02 | 11211 | 0.2886 |
| 0047 | 03 | 11212 | 0.0115 |
| 0047 | 04 | 11221 | 0.0067 |
| 0047 | 05 | 12211 | 0.1831 |
| 0047 | 06 | 12212 | 0.0073 |
| 0047 | 07 | 12221 | 0.0042 |
| 0047 | 08 | 21111 | 0.0016 |
| 0047 | 09 | 21211 | 0.2851 |
| 0047 | 10 | 21212 | 0.0114 |
| 0047 | 11 | 21221 | 0.0066 |
| 0047 | 12 | 22211 | 0.1809 |
| 0047 | 13 | 22212 | 0.0072 |
| 0047 | 14 | 22221 | 0.0042 |
| 0048 | 01 | 11111 | 0.8792 |
| 0048 | 02 | 11112 | 0.0352 |
| 0048 | 03 | 11121 | 0.0033 |
| 0048 | 04 | 11211 | 0.0048 |
| 0048 | 05 | 12111 | 0.0203 |
| 0048 | 06 | 21111 | 0.0539 |
| 0048 | 07 | 21112 | 0.0022 |
| 0048 | 08 | 22111 | 0.0012 |
| 0049 | 01 | 11211 | 0.0017 |
| 0049 | 02 | 11221 | 0.0011 |
| 0049 | 03 | 21111 | 0.0032 |
| 0049 | 04 | 21121 | 0.0020 |
| 0049 | 05 | 21211 | 0.5951 |
| 0049 | 06 | 21221 | 0.3745 |

|      |    |       |        |
|------|----|-------|--------|
| 0049 | 07 | 22211 | 0.0137 |
| 0049 | 08 | 22221 | 0.0086 |
| 0050 | 01 | 11211 | 0.0203 |
| 0050 | 02 | 12111 | 0.0048 |
| 0050 | 03 | 12211 | 0.8792 |
| 0050 | 04 | 12212 | 0.0352 |
| 0050 | 05 | 12221 | 0.0033 |
| 0050 | 06 | 21211 | 0.0012 |
| 0050 | 07 | 22211 | 0.0539 |
| 0050 | 08 | 22212 | 0.0022 |
| 0051 | 01 | 12121 | 0.0019 |
| 0051 | 02 | 12122 | 0.0475 |
| 0051 | 03 | 12222 | 0.0078 |
| 0051 | 04 | 22112 | 0.0029 |
| 0051 | 05 | 22121 | 0.0310 |
| 0051 | 06 | 22122 | 0.7760 |
| 0051 | 07 | 22221 | 0.0051 |
| 0051 | 08 | 22222 | 0.1277 |
| 0052 | 01 | 11111 | 0.1488 |
| 0052 | 02 | 11211 | 0.0301 |
| 0052 | 03 | 12111 | 0.0733 |
| 0052 | 04 | 12211 | 0.0148 |
| 0052 | 05 | 21111 | 0.4076 |
| 0052 | 06 | 21121 | 0.0015 |
| 0052 | 07 | 21211 | 0.0825 |
| 0052 | 08 | 22111 | 0.2008 |
| 0052 | 09 | 22211 | 0.0406 |
| 0053 | 01 | 11111 | 0.1565 |
| 0053 | 02 | 11112 | 0.0063 |
| 0053 | 03 | 11211 | 0.2784 |
| 0053 | 04 | 11212 | 0.0111 |
| 0053 | 05 | 11221 | 0.0010 |
| 0053 | 06 | 21111 | 0.1887 |
| 0053 | 07 | 21112 | 0.0075 |
| 0053 | 08 | 21211 | 0.3358 |
| 0053 | 09 | 21212 | 0.0134 |
| 0053 | 10 | 21221 | 0.0012 |
| 0054 | 01 | 12111 | 0.0026 |
| 0054 | 02 | 21111 | 0.0215 |
| 0054 | 03 | 22111 | 0.9302 |
| 0054 | 04 | 22112 | 0.0372 |
| 0054 | 05 | 22121 | 0.0035 |
| 0054 | 06 | 22211 | 0.0051 |
| 0055 | 01 | 11122 | 0.0175 |
| 0055 | 02 | 11222 | 0.0029 |
| 0055 | 03 | 12112 | 0.0028 |

|      |    |       |        |
|------|----|-------|--------|
| 0055 | 04 | 12121 | 0.0304 |
| 0055 | 05 | 12122 | 0.7593 |
| 0055 | 06 | 12221 | 0.0050 |
| 0055 | 07 | 12222 | 0.1250 |
| 0055 | 08 | 21122 | 0.0011 |
| 0055 | 09 | 22121 | 0.0019 |
| 0055 | 10 | 22122 | 0.0465 |
| 0055 | 11 | 22222 | 0.0077 |
| 0056 | 01 | 11111 | 0.0417 |
| 0056 | 02 | 11112 | 0.0017 |
| 0056 | 03 | 11121 | 0.0262 |
| 0056 | 04 | 11122 | 0.0010 |
| 0056 | 05 | 11211 | 0.2534 |
| 0056 | 06 | 11212 | 0.0101 |
| 0056 | 07 | 11221 | 0.1594 |
| 0056 | 08 | 11222 | 0.0064 |
| 0056 | 09 | 12111 | 0.0417 |
| 0056 | 10 | 12112 | 0.0017 |
| 0056 | 11 | 12121 | 0.0262 |
| 0056 | 12 | 12122 | 0.0010 |
| 0056 | 13 | 12211 | 0.2534 |
| 0056 | 14 | 12212 | 0.0101 |
| 0056 | 15 | 12221 | 0.1594 |
| 0056 | 16 | 12222 | 0.0064 |
| 0057 | 01 | 12122 | 0.0023 |
| 0057 | 02 | 22112 | 0.0031 |
| 0057 | 03 | 22121 | 0.0328 |
| 0057 | 04 | 22122 | 0.8212 |
| 0057 | 05 | 22221 | 0.0054 |
| 0057 | 06 | 22222 | 0.1352 |
| 0058 | 01 | 11111 | 0.0216 |
| 0058 | 02 | 11121 | 0.0136 |
| 0058 | 03 | 11211 | 0.1503 |
| 0058 | 04 | 11221 | 0.0945 |
| 0058 | 05 | 12111 | 0.0552 |
| 0058 | 06 | 12121 | 0.0348 |
| 0058 | 07 | 12211 | 0.3849 |
| 0058 | 08 | 12221 | 0.2422 |
| 0058 | 09 | 22211 | 0.0018 |
| 0058 | 10 | 22221 | 0.0012 |
| 0059 | 01 | 12111 | 0.0277 |
| 0059 | 02 | 12211 | 0.0282 |
| 0059 | 03 | 21111 | 0.0137 |
| 0059 | 04 | 21211 | 0.0139 |
| 0059 | 05 | 22111 | 0.4529 |
| 0059 | 06 | 22121 | 0.0017 |

|      |    |       |        |
|------|----|-------|--------|
| 0059 | 07 | 22211 | 0.4601 |
| 0059 | 08 | 22221 | 0.0017 |
| 0060 | 01 | 11111 | 0.1534 |
| 0060 | 02 | 11121 | 0.0966 |
| 0060 | 03 | 11211 | 0.1534 |
| 0060 | 04 | 11221 | 0.0966 |
| 0060 | 05 | 12111 | 0.1534 |
| 0060 | 06 | 12121 | 0.0966 |
| 0060 | 07 | 12211 | 0.1534 |
| 0060 | 08 | 12221 | 0.0966 |
| 0061 | 01 | 12211 | 0.0015 |
| 0061 | 02 | 22111 | 0.0866 |
| 0061 | 03 | 22121 | 0.0545 |
| 0061 | 04 | 22211 | 0.5262 |
| 0061 | 05 | 22221 | 0.3311 |
| 0062 | 01 | 12112 | 0.0033 |
| 0062 | 02 | 12121 | 0.0359 |
| 0062 | 03 | 12122 | 0.8986 |
| 0062 | 04 | 12222 | 0.0049 |
| 0062 | 05 | 22121 | 0.0022 |
| 0062 | 06 | 22122 | 0.0550 |
| 0063 | 01 | 11112 | 0.0020 |
| 0063 | 02 | 11121 | 0.0016 |
| 0063 | 03 | 11122 | 0.0082 |
| 0063 | 04 | 11212 | 0.0015 |
| 0063 | 05 | 11221 | 0.0012 |
| 0063 | 06 | 11222 | 0.0062 |
| 0063 | 07 | 12111 | 0.0165 |
| 0063 | 08 | 12112 | 0.0864 |
| 0063 | 09 | 12121 | 0.0678 |
| 0063 | 10 | 12122 | 0.3554 |
| 0063 | 11 | 12211 | 0.0125 |
| 0063 | 12 | 12212 | 0.0653 |
| 0063 | 13 | 12221 | 0.0512 |
| 0063 | 14 | 12222 | 0.2686 |
| 0063 | 15 | 22111 | 0.0010 |
| 0063 | 16 | 22112 | 0.0053 |
| 0063 | 17 | 22121 | 0.0042 |
| 0063 | 18 | 22122 | 0.0218 |
| 0063 | 19 | 22212 | 0.0040 |
| 0063 | 20 | 22221 | 0.0031 |
| 0063 | 21 | 22222 | 0.0165 |
| 0064 | 01 | 11112 | 0.0023 |
| 0064 | 02 | 11122 | 0.6143 |
| 0064 | 03 | 11222 | 0.0033 |
| 0064 | 04 | 12122 | 0.0142 |

|      |    |       |        |
|------|----|-------|--------|
| 0064 | 05 | 21112 | 0.0013 |
| 0064 | 06 | 21122 | 0.3545 |
| 0064 | 07 | 21222 | 0.0019 |
| 0064 | 08 | 22122 | 0.0082 |
| 0065 | 01 | 12211 | 0.0027 |
| 0065 | 02 | 22111 | 0.0052 |
| 0065 | 03 | 22211 | 0.9506 |
| 0065 | 04 | 22212 | 0.0380 |
| 0065 | 05 | 22221 | 0.0035 |
| 0066 | 01 | 12111 | 0.0833 |
| 0066 | 02 | 12112 | 0.0033 |
| 0066 | 03 | 12121 | 0.0524 |
| 0066 | 04 | 12122 | 0.0021 |
| 0066 | 05 | 12211 | 0.5060 |
| 0066 | 06 | 12212 | 0.0202 |
| 0066 | 07 | 12221 | 0.3184 |
| 0066 | 08 | 12222 | 0.0127 |
| 0066 | 09 | 22211 | 0.0014 |
| 0067 | 01 | 11211 | 0.0534 |
| 0067 | 02 | 11212 | 0.0021 |
| 0067 | 03 | 12211 | 0.0016 |
| 0067 | 04 | 21111 | 0.0048 |
| 0067 | 05 | 21211 | 0.8724 |
| 0067 | 06 | 21212 | 0.0349 |
| 0067 | 07 | 21221 | 0.0032 |
| 0067 | 08 | 22211 | 0.0264 |
| 0067 | 09 | 22212 | 0.0011 |
| 0068 | 01 | 11111 | 0.0361 |
| 0068 | 02 | 11121 | 0.0227 |
| 0068 | 03 | 11211 | 0.2194 |
| 0068 | 04 | 11221 | 0.1381 |
| 0068 | 05 | 12211 | 0.0051 |
| 0068 | 06 | 12221 | 0.0032 |
| 0068 | 07 | 21111 | 0.0489 |
| 0068 | 08 | 21121 | 0.0307 |
| 0068 | 09 | 21211 | 0.2968 |
| 0068 | 10 | 21221 | 0.1867 |
| 0068 | 11 | 22111 | 0.0011 |
| 0068 | 12 | 22211 | 0.0068 |
| 0068 | 13 | 22221 | 0.0043 |
| 0069 | 01 | 12112 | 0.0043 |
| 0069 | 02 | 12121 | 0.0048 |
| 0069 | 03 | 12122 | 0.0214 |
| 0069 | 04 | 12212 | 0.0036 |
| 0069 | 05 | 12221 | 0.0040 |
| 0069 | 06 | 12222 | 0.0179 |

|      |    |       |        |
|------|----|-------|--------|
| 0069 | 07 | 22111 | 0.0159 |
| 0069 | 08 | 22112 | 0.0702 |
| 0069 | 09 | 22121 | 0.0791 |
| 0069 | 10 | 22122 | 0.3493 |
| 0069 | 11 | 22211 | 0.0133 |
| 0069 | 12 | 22212 | 0.0586 |
| 0069 | 13 | 22221 | 0.0660 |
| 0069 | 14 | 22222 | 0.2917 |
| 0070 | 01 | 11111 | 0.0114 |
| 0070 | 02 | 12111 | 0.4964 |
| 0070 | 03 | 12112 | 0.0206 |
| 0070 | 04 | 12121 | 0.0283 |
| 0070 | 05 | 12122 | 0.0012 |
| 0070 | 06 | 12211 | 0.0257 |
| 0070 | 07 | 12212 | 0.0011 |
| 0070 | 08 | 12221 | 0.0015 |
| 0070 | 09 | 21111 | 0.0081 |
| 0070 | 10 | 22111 | 0.3519 |
| 0070 | 11 | 22112 | 0.0146 |
| 0070 | 12 | 22121 | 0.0200 |
| 0070 | 13 | 22211 | 0.0182 |
| 0070 | 14 | 22221 | 0.0010 |
| 0071 | 01 | 11111 | 0.1070 |
| 0071 | 02 | 11112 | 0.0043 |
| 0071 | 03 | 11121 | 0.0674 |
| 0071 | 04 | 11122 | 0.0027 |
| 0071 | 05 | 11211 | 0.0176 |
| 0071 | 06 | 11221 | 0.0111 |
| 0071 | 07 | 21111 | 0.4003 |
| 0071 | 08 | 21112 | 0.0160 |
| 0071 | 09 | 21121 | 0.2519 |
| 0071 | 10 | 21122 | 0.0101 |
| 0071 | 11 | 21211 | 0.0659 |
| 0071 | 12 | 21212 | 0.0026 |
| 0071 | 13 | 21221 | 0.0415 |
| 0071 | 14 | 21222 | 0.0017 |
| 0072 | 01 | 11112 | 0.0195 |
| 0072 | 02 | 11122 | 0.0310 |
| 0072 | 03 | 11212 | 0.1183 |
| 0072 | 04 | 11222 | 0.1881 |
| 0072 | 05 | 12112 | 0.0079 |
| 0072 | 06 | 12122 | 0.0126 |
| 0072 | 07 | 12212 | 0.0480 |
| 0072 | 08 | 12222 | 0.0763 |
| 0072 | 09 | 21112 | 0.0194 |
| 0072 | 10 | 21122 | 0.0308 |

|      |    |       |        |
|------|----|-------|--------|
| 0072 | 11 | 21212 | 0.1176 |
| 0072 | 12 | 21222 | 0.1869 |
| 0072 | 13 | 22112 | 0.0079 |
| 0072 | 14 | 22122 | 0.0125 |
| 0072 | 15 | 22212 | 0.0477 |
| 0072 | 16 | 22222 | 0.0758 |
| 0073 | 01 | 11111 | 0.9492 |
| 0073 | 02 | 11112 | 0.0380 |
| 0073 | 03 | 11121 | 0.0035 |
| 0073 | 04 | 11211 | 0.0052 |
| 0073 | 05 | 12111 | 0.0015 |
| 0073 | 06 | 21111 | 0.0027 |
| 0074 | 01 | 11111 | 0.0094 |
| 0074 | 02 | 11112 | 0.0111 |
| 0074 | 03 | 11121 | 0.0114 |
| 0074 | 04 | 11122 | 0.0135 |
| 0074 | 05 | 11211 | 0.0279 |
| 0074 | 06 | 11212 | 0.0330 |
| 0074 | 07 | 11221 | 0.0338 |
| 0074 | 08 | 11222 | 0.0400 |
| 0074 | 09 | 12111 | 0.0143 |
| 0074 | 10 | 12112 | 0.0169 |
| 0074 | 11 | 12121 | 0.0173 |
| 0074 | 12 | 12122 | 0.0205 |
| 0074 | 13 | 12211 | 0.0423 |
| 0074 | 14 | 12212 | 0.0501 |
| 0074 | 15 | 12221 | 0.0512 |
| 0074 | 16 | 12222 | 0.0607 |
| 0074 | 17 | 21111 | 0.0113 |
| 0074 | 18 | 21112 | 0.0134 |
| 0074 | 19 | 21121 | 0.0137 |
| 0074 | 20 | 21122 | 0.0163 |
| 0074 | 21 | 21211 | 0.0336 |
| 0074 | 22 | 21212 | 0.0398 |
| 0074 | 23 | 21221 | 0.0407 |
| 0074 | 24 | 21222 | 0.0482 |
| 0074 | 25 | 22111 | 0.0172 |
| 0074 | 26 | 22112 | 0.0204 |
| 0074 | 27 | 22121 | 0.0208 |
| 0074 | 28 | 22122 | 0.0247 |
| 0074 | 29 | 22211 | 0.0510 |
| 0074 | 30 | 22212 | 0.0604 |
| 0074 | 31 | 22221 | 0.0618 |
| 0074 | 32 | 22222 | 0.0732 |
| 0075 | 01 | 11111 | 0.0052 |
| 0075 | 02 | 11211 | 0.9529 |



|      |    |       |        |
|------|----|-------|--------|
| 0075 | 03 | 11221 | 0.0035 |
| 0075 | 04 | 12211 | 0.0220 |
| 0075 | 05 | 21211 | 0.0164 |
| 0076 | 01 | 11122 | 0.0023 |
| 0076 | 02 | 21112 | 0.0031 |
| 0076 | 03 | 21122 | 0.8226 |
| 0076 | 04 | 21222 | 0.1496 |
| 0076 | 05 | 22122 | 0.0190 |
| 0076 | 06 | 22222 | 0.0035 |
| 0077 | 01 | 12122 | 0.0024 |
| 0077 | 02 | 22111 | 0.0044 |
| 0077 | 03 | 22112 | 0.1104 |
| 0077 | 04 | 22121 | 0.0338 |
| 0077 | 05 | 22122 | 0.8445 |
| 0077 | 06 | 22222 | 0.0046 |
| 0078 | 01 | 11111 | 0.0294 |
| 0078 | 02 | 11112 | 0.0966 |
| 0078 | 03 | 11121 | 0.0535 |
| 0078 | 04 | 11122 | 0.1755 |
| 0078 | 05 | 11211 | 0.0490 |
| 0078 | 06 | 11212 | 0.1610 |
| 0078 | 07 | 11221 | 0.0891 |
| 0078 | 08 | 11222 | 0.2926 |
| 0078 | 09 | 12111 | 0.0017 |
| 0078 | 10 | 12112 | 0.0054 |
| 0078 | 11 | 12121 | 0.0030 |
| 0078 | 12 | 12122 | 0.0099 |
| 0078 | 13 | 12211 | 0.0028 |
| 0078 | 14 | 12212 | 0.0091 |
| 0078 | 15 | 12221 | 0.0050 |
| 0078 | 16 | 12222 | 0.0165 |
| 0079 | 01 | 11112 | 0.0116 |
| 0079 | 02 | 11122 | 0.0184 |
| 0079 | 03 | 11212 | 0.0019 |
| 0079 | 04 | 11222 | 0.0030 |
| 0079 | 05 | 12112 | 0.0075 |
| 0079 | 06 | 12122 | 0.0120 |
| 0079 | 07 | 12212 | 0.0012 |
| 0079 | 08 | 12222 | 0.0020 |
| 0079 | 09 | 21112 | 0.1893 |
| 0079 | 10 | 21122 | 0.3008 |
| 0079 | 11 | 21212 | 0.0312 |
| 0079 | 12 | 21222 | 0.0495 |
| 0079 | 13 | 22112 | 0.1232 |
| 0079 | 14 | 22122 | 0.1958 |
| 0079 | 15 | 22212 | 0.0203 |

|      |    |       |        |
|------|----|-------|--------|
| 0079 | 16 | 22222 | 0.0322 |
| 0080 | 01 | 11111 | 0.0033 |
| 0080 | 02 | 11121 | 0.0021 |
| 0080 | 03 | 11211 | 0.6076 |
| 0080 | 04 | 11221 | 0.3823 |
| 0080 | 05 | 21211 | 0.0029 |
| 0080 | 06 | 21221 | 0.0018 |
| 0081 | 01 | 11111 | 0.0030 |
| 0081 | 02 | 12111 | 0.0035 |
| 0081 | 03 | 21111 | 0.4409 |
| 0081 | 04 | 21112 | 0.0176 |
| 0081 | 05 | 21121 | 0.0016 |
| 0081 | 06 | 21211 | 0.0024 |
| 0081 | 07 | 22111 | 0.5061 |
| 0081 | 08 | 22112 | 0.0202 |
| 0081 | 09 | 22121 | 0.0019 |
| 0081 | 10 | 22211 | 0.0028 |
| 0082 | 01 | 11111 | 0.0015 |
| 0082 | 02 | 11211 | 0.0093 |
| 0082 | 03 | 12111 | 0.0664 |
| 0082 | 04 | 12112 | 0.0027 |
| 0082 | 05 | 12211 | 0.4035 |
| 0082 | 06 | 12212 | 0.0161 |
| 0082 | 07 | 12221 | 0.0015 |
| 0082 | 08 | 21111 | 0.0015 |
| 0082 | 09 | 21211 | 0.0093 |
| 0082 | 10 | 22111 | 0.0662 |
| 0082 | 11 | 22112 | 0.0026 |
| 0082 | 12 | 22211 | 0.4018 |
| 0082 | 13 | 22212 | 0.0161 |
| 0082 | 14 | 22221 | 0.0015 |
| 0083 | 01 | 11211 | 0.0125 |
| 0083 | 02 | 11221 | 0.0079 |
| 0083 | 03 | 12111 | 0.0030 |
| 0083 | 04 | 12121 | 0.0019 |
| 0083 | 05 | 12211 | 0.5426 |
| 0083 | 06 | 12212 | 0.0217 |
| 0083 | 07 | 12221 | 0.3414 |
| 0083 | 08 | 12222 | 0.0137 |
| 0083 | 09 | 22211 | 0.0332 |
| 0083 | 10 | 22212 | 0.0013 |
| 0083 | 11 | 22221 | 0.0209 |
| 0084 | 01 | 11111 | 0.5389 |
| 0084 | 02 | 11112 | 0.0018 |
| 0084 | 03 | 11121 | 0.0097 |
| 0084 | 04 | 11211 | 0.1836 |

|      |    |       |        |
|------|----|-------|--------|
| 0084 | 05 | 11221 | 0.0033 |
| 0084 | 06 | 12111 | 0.1913 |
| 0084 | 07 | 12121 | 0.0034 |
| 0084 | 08 | 12211 | 0.0652 |
| 0084 | 09 | 12221 | 0.0012 |
| 0084 | 10 | 21111 | 0.0015 |
| 0085 | 01 | 11111 | 0.2579 |
| 0085 | 02 | 11112 | 0.0103 |
| 0085 | 03 | 11121 | 0.1623 |
| 0085 | 04 | 11122 | 0.0065 |
| 0085 | 05 | 11211 | 0.0425 |
| 0085 | 06 | 11212 | 0.0017 |
| 0085 | 07 | 11221 | 0.0267 |
| 0085 | 08 | 11222 | 0.0011 |
| 0085 | 09 | 21111 | 0.2489 |
| 0085 | 10 | 21112 | 0.0100 |
| 0085 | 11 | 21121 | 0.1566 |
| 0085 | 12 | 21122 | 0.0063 |
| 0085 | 13 | 21211 | 0.0410 |
| 0085 | 14 | 21212 | 0.0016 |
| 0085 | 15 | 21221 | 0.0258 |
| 0085 | 16 | 21222 | 0.0010 |
| 0086 | 01 | 11111 | 0.4281 |
| 0086 | 02 | 11112 | 0.0171 |
| 0086 | 03 | 11121 | 0.0016 |
| 0086 | 04 | 11211 | 0.0705 |
| 0086 | 05 | 11212 | 0.0028 |
| 0086 | 06 | 12111 | 0.3903 |
| 0086 | 07 | 12112 | 0.0156 |
| 0086 | 08 | 12121 | 0.0015 |
| 0086 | 09 | 12211 | 0.0643 |
| 0086 | 10 | 12212 | 0.0026 |
| 0086 | 11 | 21111 | 0.0029 |
| 0086 | 12 | 22111 | 0.0027 |
| 0087 | 01 | 11111 | 0.0084 |
| 0087 | 02 | 11121 | 0.0053 |
| 0087 | 03 | 12111 | 0.3645 |
| 0087 | 04 | 12112 | 0.0146 |
| 0087 | 05 | 12121 | 0.2294 |
| 0087 | 06 | 12122 | 0.0092 |
| 0087 | 07 | 12211 | 0.0020 |
| 0087 | 08 | 12221 | 0.0012 |
| 0087 | 09 | 21111 | 0.0049 |
| 0087 | 10 | 21121 | 0.0031 |
| 0087 | 11 | 22111 | 0.2103 |
| 0087 | 12 | 22112 | 0.0084 |

|      |    |       |        |
|------|----|-------|--------|
| 0087 | 13 | 22121 | 0.1323 |
| 0087 | 14 | 22122 | 0.0053 |
| 0087 | 15 | 22211 | 0.0011 |
| 0088 | 01 | 11111 | 0.0050 |
| 0088 | 02 | 11121 | 0.0032 |
| 0088 | 03 | 11211 | 0.0304 |
| 0088 | 04 | 11221 | 0.0191 |
| 0088 | 05 | 21111 | 0.0818 |
| 0088 | 06 | 21121 | 0.0514 |
| 0088 | 07 | 21211 | 0.4966 |
| 0088 | 08 | 21221 | 0.3125 |
| 0089 | 01 | 11122 | 0.0052 |
| 0089 | 02 | 11212 | 0.0035 |
| 0089 | 03 | 11221 | 0.0380 |
| 0089 | 04 | 11222 | 0.9506 |
| 0089 | 05 | 21222 | 0.0027 |
| 0090 | 01 | 11111 | 0.0561 |
| 0090 | 02 | 11112 | 0.0022 |
| 0090 | 03 | 11211 | 0.3411 |
| 0090 | 04 | 11212 | 0.0136 |
| 0090 | 05 | 11221 | 0.0013 |
| 0090 | 06 | 12111 | 0.0556 |
| 0090 | 07 | 12112 | 0.0022 |
| 0090 | 08 | 12211 | 0.3379 |
| 0090 | 09 | 12212 | 0.0135 |
| 0090 | 10 | 12221 | 0.0013 |
| 0090 | 11 | 21111 | 0.0120 |
| 0090 | 12 | 21211 | 0.0730 |
| 0090 | 13 | 21212 | 0.0029 |
| 0090 | 14 | 22111 | 0.0119 |
| 0090 | 15 | 22211 | 0.0724 |
| 0090 | 16 | 22212 | 0.0029 |
| 0091 | 01 | 11122 | 0.0077 |
| 0091 | 02 | 11221 | 0.0019 |
| 0091 | 03 | 11222 | 0.0465 |
| 0091 | 04 | 12222 | 0.0011 |
| 0091 | 05 | 21121 | 0.0050 |
| 0091 | 06 | 21122 | 0.1250 |
| 0091 | 07 | 21212 | 0.0028 |
| 0091 | 08 | 21221 | 0.0304 |
| 0091 | 09 | 21222 | 0.7593 |
| 0091 | 10 | 22122 | 0.0029 |
| 0091 | 11 | 22222 | 0.0175 |
| 0092 | 01 | 11111 | 0.0150 |
| 0092 | 02 | 11121 | 0.0095 |
| 0092 | 03 | 11211 | 0.0298 |

|      |    |       |        |
|------|----|-------|--------|
| 0092 | 04 | 11221 | 0.0187 |
| 0092 | 05 | 12111 | 0.0336 |
| 0092 | 06 | 12121 | 0.0211 |
| 0092 | 07 | 12211 | 0.0665 |
| 0092 | 08 | 12221 | 0.0418 |
| 0092 | 09 | 21111 | 0.0486 |
| 0092 | 10 | 21121 | 0.0306 |
| 0092 | 11 | 21211 | 0.0964 |
| 0092 | 12 | 21221 | 0.0607 |
| 0092 | 13 | 22111 | 0.1086 |
| 0092 | 14 | 22121 | 0.0683 |
| 0092 | 15 | 22211 | 0.2152 |
| 0092 | 16 | 22221 | 0.1354 |
| 0093 | 01 | 11122 | 0.0024 |
| 0093 | 02 | 12111 | 0.0177 |
| 0093 | 03 | 12112 | 0.0662 |
| 0093 | 04 | 12121 | 0.0628 |
| 0093 | 05 | 12122 | 0.2349 |
| 0093 | 06 | 12211 | 0.0032 |
| 0093 | 07 | 12212 | 0.0120 |
| 0093 | 08 | 12221 | 0.0114 |
| 0093 | 09 | 12222 | 0.0427 |
| 0093 | 10 | 21122 | 0.0029 |
| 0093 | 11 | 22111 | 0.0213 |
| 0093 | 12 | 22112 | 0.0798 |
| 0093 | 13 | 22121 | 0.0757 |
| 0093 | 14 | 22122 | 0.2833 |
| 0093 | 15 | 22211 | 0.0039 |
| 0093 | 16 | 22212 | 0.0145 |
| 0093 | 17 | 22221 | 0.0138 |
| 0093 | 18 | 22222 | 0.0515 |
| 0094 | 01 | 11111 | 0.4808 |
| 0094 | 02 | 11121 | 0.0018 |
| 0094 | 03 | 11211 | 0.0026 |
| 0094 | 04 | 12111 | 0.0049 |
| 0094 | 05 | 21111 | 0.5002 |
| 0094 | 06 | 21121 | 0.0019 |
| 0094 | 07 | 21211 | 0.0027 |
| 0094 | 08 | 22111 | 0.0051 |
| 0095 | 01 | 11122 | 0.0011 |
| 0095 | 02 | 11212 | 0.0043 |
| 0095 | 03 | 11222 | 0.0068 |
| 0095 | 04 | 12112 | 0.0232 |
| 0095 | 05 | 12121 | 0.0015 |
| 0095 | 06 | 12122 | 0.0368 |
| 0095 | 07 | 12211 | 0.0056 |

|      |    |       |        |
|------|----|-------|--------|
| 0095 | 08 | 12212 | 0.1408 |
| 0095 | 09 | 12221 | 0.0090 |
| 0095 | 10 | 12222 | 0.2237 |
| 0095 | 11 | 21122 | 0.0013 |
| 0095 | 12 | 21212 | 0.0051 |
| 0095 | 13 | 21222 | 0.0082 |
| 0095 | 14 | 22111 | 0.0011 |
| 0095 | 15 | 22112 | 0.0280 |
| 0095 | 16 | 22121 | 0.0018 |
| 0095 | 17 | 22122 | 0.0444 |
| 0095 | 18 | 22211 | 0.0068 |
| 0095 | 19 | 22212 | 0.1698 |
| 0095 | 20 | 22221 | 0.0108 |
| 0095 | 21 | 22222 | 0.2699 |
| 0096 | 01 | 11111 | 0.0281 |
| 0096 | 02 | 11112 | 0.0345 |
| 0096 | 03 | 11121 | 0.0341 |
| 0096 | 04 | 11122 | 0.0419 |
| 0096 | 05 | 11211 | 0.1705 |
| 0096 | 06 | 11212 | 0.2097 |
| 0096 | 07 | 11221 | 0.2070 |
| 0096 | 08 | 11222 | 0.2547 |
| 0096 | 09 | 12211 | 0.0039 |
| 0096 | 10 | 12212 | 0.0048 |
| 0096 | 11 | 12221 | 0.0048 |
| 0096 | 12 | 12222 | 0.0059 |
| 0097 | 01 | 12111 | 0.2664 |
| 0097 | 02 | 12121 | 0.1676 |
| 0097 | 03 | 12211 | 0.0256 |
| 0097 | 04 | 12221 | 0.0161 |
| 0097 | 05 | 22111 | 0.2937 |
| 0097 | 06 | 22121 | 0.1848 |
| 0097 | 07 | 22211 | 0.0282 |
| 0097 | 08 | 22221 | 0.0177 |
| 0098 | 01 | 12212 | 0.0066 |
| 0098 | 02 | 12222 | 0.0776 |
| 0098 | 03 | 21222 | 0.0068 |
| 0098 | 04 | 22122 | 0.0045 |
| 0098 | 05 | 22212 | 0.0709 |
| 0098 | 06 | 22222 | 0.8336 |

-----

**II. Phenotypic Fitness Data for QTL Mapping and for assessing compensatory responses**

**Year 1 Data**

ANOVA

| SOURCE     | SS       | DF  | MS     | F      | P     |
|------------|----------|-----|--------|--------|-------|
| TRT\$      | 1368     | 1   | 1368   | 0.166  | 0.684 |
| LINE       | 8150.17  | 92  | 88589  | 10.755 | 0.000 |
| TRT\$*LINE | 1250.508 | 92  | 13.592 | 1.650  | 0.000 |
| ERROR      | 5387.187 | 654 | 8.237  |        |       |

**Normality Plot**

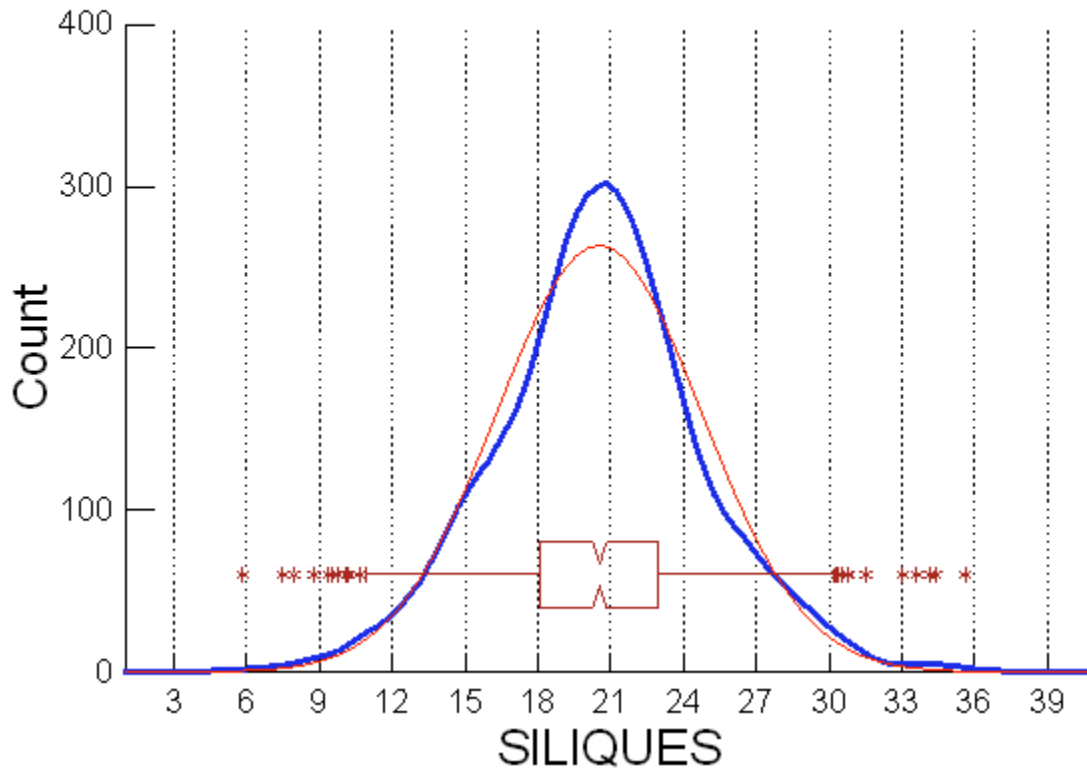

\* Data approximate normality with sqrt transformation with homogeneity of variances (Levene's Test 0.701, p=0.403)

| Clipping Treatment | Line | Siliques |
|--------------------|------|----------|
| uc                 | 1    | 558      |
| uc                 | 1    | 498      |
| uc                 | 1    | 233      |
| uc                 | 1    | .        |
| uc                 | 1    | .        |
| uc                 | 2    | 295      |
| uc                 | 2    | 34       |
| uc                 | 2    | 398      |
| uc                 | 2    | 321      |
| uc                 | 2    | 442      |
| uc                 | 3    | 358      |
| uc                 | 3    | 321      |
| uc                 | 3    | 479      |
| uc                 | 3    | 354      |
| uc                 | 3    | 355      |
| uc                 | 4    | 386      |
| uc                 | 4    | 196      |
| uc                 | 4    | 241      |
| uc                 | 4    | 157      |
| uc                 | 4    | 283      |
| uc                 | 5    | 224      |
| uc                 | 5    | 402      |
| uc                 | 5    | 267      |
| uc                 | 5    | 432      |
| uc                 | 5    | 223      |
| uc                 | 6    | 382      |
| uc                 | 6    | 415      |
| uc                 | 6    | 308      |
| uc                 | 6    | .        |
| uc                 | 6    | .        |
| uc                 | 7    | 496      |
| uc                 | 7    | 540      |
| uc                 | 7    | 546      |
| uc                 | 7    | 824      |
| uc                 | 7    | 309      |
| uc                 | 8    | 567      |
| uc                 | 8    | 515      |
| uc                 | 8    | 501      |
| uc                 | 8    | 334      |
| uc                 | 8    | 305      |
| uc                 | 9    | 443      |
| uc                 | 9    | 845      |
| uc                 | 9    | 681      |
| uc                 | 9    | 573      |
| uc                 | 9    | .        |
| uc                 | 10   | 223      |
| uc                 | 10   | 333      |
| uc                 | 10   | 439      |



|    |    |     |
|----|----|-----|
| uc | 10 | 176 |
| uc | 10 | .   |
| uc | 11 | 423 |
| uc | 11 | 509 |
| uc | 11 | 380 |
| uc | 11 | 370 |
| uc | 11 | 471 |
| uc | 12 | 632 |
| uc | 12 | 718 |
| uc | 12 | 518 |
| uc | 12 | 502 |
| uc | 12 | 594 |
| uc | 13 | 450 |
| uc | 13 | 77  |
| uc | 13 | 545 |
| uc | 13 | 477 |
| uc | 13 | 400 |
| uc | 14 | 361 |
| uc | 14 | 228 |
| uc | 14 | 428 |
| uc | 14 | 479 |
| uc | 14 | .   |
| uc | 15 | 354 |
| uc | 15 | 413 |
| uc | 15 | 377 |
| uc | 15 | 291 |
| uc | 15 | 375 |
| uc | 16 | 167 |
| uc | 16 | 344 |
| uc | 16 | 360 |
| uc | 16 | .   |
| uc | 16 | .   |
| uc | 17 | 372 |
| uc | 17 | 188 |
| uc | 17 | 430 |
| uc | 17 | 329 |
| uc | 17 | .   |
| uc | 18 | 503 |
| uc | 18 | 499 |
| uc | 18 | .   |
| uc | 18 | .   |
| uc | 19 | 660 |
| uc | 19 | 641 |
| uc | 19 | 904 |
| uc | 19 | 266 |
| uc | 19 | 540 |
| uc | 20 | 443 |
| uc | 20 | 489 |
| uc | 20 | 367 |
| uc | 20 | 273 |

|    |    |     |
|----|----|-----|
| uc | 20 | 319 |
| uc | 21 | 380 |
| uc | 21 | 362 |
| uc | 21 | .   |
| uc | 21 | .   |
| uc | 21 | .   |
| uc | 22 | 56  |
| uc | 22 | 370 |
| uc | 22 | 333 |
| uc | 22 | 767 |
| uc | 22 | .   |
| uc | 23 | 257 |
| uc | 23 | 370 |
| uc | 23 | 331 |
| uc | 23 | 242 |
| uc | 23 | 239 |
| uc | 24 | 613 |
| uc | 24 | 501 |
| uc | 24 | 571 |
| uc | 24 | 600 |
| uc | 24 | 794 |
| uc | 25 | 196 |
| uc | 25 | 187 |
| uc | 25 | 95  |
| uc | 25 | 213 |
| uc | 25 | 198 |
| uc | 27 | 392 |
| uc | 27 | 273 |
| uc | 27 | 376 |
| uc | 27 | 463 |
| uc | 27 | 413 |
| uc | 28 | 695 |
| uc | 28 | 408 |
| uc | 28 | 640 |
| uc | 28 | 438 |
| uc | 28 | 456 |
| uc | 30 | .   |
| uc | 31 | 255 |
| uc | 31 | 483 |
| uc | 31 | 420 |
| uc | 31 | .   |
| uc | 32 | 401 |
| uc | 32 | 741 |

|    |    |     |
|----|----|-----|
| uc | 32 | 527 |
| uc | 32 | 472 |
| uc | 32 | 679 |
| uc | 33 | 412 |
| uc | 33 | 304 |
| uc | 33 | 333 |
| uc | 33 | 341 |
| uc | 33 | 315 |
| uc | 34 | 321 |
| uc | 34 | 385 |
| uc | 34 | 654 |
| uc | 35 | 252 |
| uc | 35 | 259 |
| uc | 35 | 226 |
| uc | 35 | .   |
| uc | 35 | .   |
| uc | 36 | 624 |
| uc | 36 | 489 |
| uc | 36 | 519 |
| uc | 36 | .   |
| uc | 36 | .   |
| uc | 36 | .   |
| uc | 37 | 402 |
| uc | 37 | 560 |
| uc | 37 | 258 |
| uc | 37 | 280 |
| uc | 37 | 500 |
| uc | 39 | .   |
| uc | 40 | 496 |
| uc | 40 | 435 |
| uc | 40 | 543 |
| uc | 40 | 424 |
| uc | 40 | .   |
| uc | 41 | 546 |
| uc | 41 | 498 |
| uc | 41 | 233 |
| uc | 41 | .   |
| uc | 41 | .   |
| uc | 42 | 190 |
| uc | 42 | 465 |
| uc | 42 | 390 |
| uc | 42 | .   |
| uc | 42 | .   |
| uc | 43 | 267 |
| uc | 43 | 295 |
| uc | 43 | 383 |
| uc | 43 | 240 |

|    |    |     |
|----|----|-----|
| uc | 43 | .   |
| uc | 44 | 360 |
| uc | 44 | 420 |
| uc | 44 | 361 |
| uc | 44 | 425 |
| uc | 44 | 296 |
| uc | 45 | 235 |
| uc | 45 | 190 |
| uc | 45 | 209 |
| uc | 45 | 137 |
| uc | 46 | 451 |
| uc | 46 | 123 |
| uc | 46 | 481 |
| uc | 46 | .   |
| uc | 47 | 609 |
| uc | 47 | 726 |
| uc | 47 | 712 |
| uc | 47 | 844 |
| uc | 47 | 716 |
| uc | 48 | 134 |
| uc | 48 | 136 |
| uc | 48 | 135 |
| uc | 48 | .   |
| uc | 48 | .   |
| uc | 49 | 259 |
| uc | 49 | 145 |
| uc | 49 | 231 |
| uc | 50 | 420 |
| uc | 50 | 399 |
| uc | 50 | 467 |
| uc | 50 | 356 |
| uc | 50 | .   |
| uc | 51 | 306 |
| uc | 51 | 329 |
| uc | 51 | 444 |
| uc | 51 | 203 |
| uc | 51 | 143 |
| uc | 52 | 474 |
| uc | 52 | 574 |
| uc | 52 | 880 |
| uc | 52 | 620 |
| uc | 52 | 656 |
| uc | 53 | 361 |
| uc | 53 | 402 |
| uc | 53 | 469 |
| uc | 53 | 435 |
| uc | 53 | 329 |
| uc | 55 | 441 |
| uc | 55 | 383 |
| uc | 55 | 458 |

|    |    |     |
|----|----|-----|
| uc | 55 | 512 |
| uc | 55 | 614 |
| uc | 56 | 352 |
| uc | 56 | 270 |
| uc | 56 | 232 |
| uc | 56 | 277 |
| uc | 56 | 263 |
| uc | 57 | 218 |
| uc | 57 | 343 |
| uc | 57 | 382 |
| uc | 57 | .   |
| uc | 57 | .   |
| uc | 58 | 406 |
| uc | 58 | 595 |
| uc | 58 | 546 |
| uc | 58 | 493 |
| uc | 58 | 388 |
| uc | 59 | 806 |
| uc | 59 | 486 |
| uc | 59 | 694 |
| uc | 59 | 666 |
| uc | 59 | .   |
| uc | 60 | 862 |
| uc | 60 | 659 |
| uc | 60 | 747 |
| uc | 60 | .   |
| uc | 60 | .   |
| uc | 61 | 243 |
| uc | 61 | 102 |
| uc | 61 | 63  |
| uc | 61 | 104 |
| uc | 61 | 235 |
| uc | 62 | 497 |
| uc | 62 | 559 |
| uc | 62 | 525 |
| uc | 62 | 712 |
| uc | 62 | 885 |
| uc | 63 | 395 |
| uc | 63 | 247 |
| uc | 63 | 281 |
| uc | 63 | 335 |
| uc | 63 | .   |
| uc | 64 | 326 |
| uc | 64 | 447 |
| uc | 64 | 311 |
| uc | 64 | 380 |
| uc | 64 | 190 |
| uc | 65 | 390 |
| uc | 65 | 452 |
| uc | 65 | 540 |

|    |    |     |
|----|----|-----|
| uc | 65 | 497 |
| uc | 65 | 614 |
| uc | 66 | 133 |
| uc | 66 | 215 |
| uc | 66 | 146 |
| uc | 66 | 183 |
| uc | 66 | 336 |
| uc | 67 | 272 |
| uc | 67 | 523 |
| uc | 67 | 183 |
| uc | 67 | 570 |
| uc | 67 | 583 |
| uc | 68 | 510 |
| uc | 68 | 610 |
| uc | 68 | 511 |
| uc | 68 | 464 |
| uc | 68 | 476 |
| uc | 69 | .   |
| uc | 70 | 131 |
| uc | 70 | 296 |
| uc | 70 | 346 |
| uc | 70 | .   |
| uc | 70 | .   |
| uc | 71 | 587 |
| uc | 71 | 751 |
| uc | 71 | 451 |
| uc | 71 | 356 |
| uc | 71 | 331 |
| uc | 72 | 172 |
| uc | 72 | 466 |
| uc | 72 | 235 |
| uc | 72 | .   |
| uc | 72 | .   |
| uc | 73 | 399 |
| uc | 73 | 305 |
| uc | 73 | 402 |
| uc | 73 | 390 |
| uc | 73 | 507 |
| uc | 74 | 257 |
| uc | 74 | 311 |
| uc | 74 | 271 |
| uc | 74 | 324 |
| uc | 74 | 374 |
| uc | 75 | 297 |
| uc | 75 | 403 |
| uc | 75 | 389 |

|    |    |      |
|----|----|------|
| uc | 75 | .    |
| uc | 75 | .    |
| uc | 76 | 447  |
| uc | 76 | 481  |
| uc | 76 | 569  |
| uc | 76 | 480  |
| uc | 76 | 515  |
| uc | 77 | 113  |
| uc | 77 | 300  |
| uc | 77 | .    |
| uc | 77 | .    |
| uc | 77 | .    |
| uc | 78 | 267  |
| uc | 78 | 227  |
| uc | 78 | 336  |
| uc | 78 | 220  |
| uc | 78 | 349  |
| uc | 79 | 433  |
| uc | 79 | 190  |
| uc | 79 | 449  |
| uc | 79 | 450  |
| uc | 79 | .    |
| uc | 80 | 551  |
| uc | 80 | 338  |
| uc | 80 | 426  |
| uc | 80 | 433  |
| uc | 80 | .    |
| uc | 81 | 326  |
| uc | 81 | 155  |
| uc | 81 | 88   |
| uc | 81 | 462  |
| uc | 81 | 91   |
| uc | 82 | 572  |
| uc | 82 | 243  |
| uc | 82 | 651  |
| uc | 82 | 201  |
| uc | 82 | 522  |
| uc | 83 | 1182 |
| uc | 83 | 1166 |
| uc | 83 | 649  |
| uc | 83 | 787  |
| uc | 83 | 653  |
| uc | 84 | 406  |
| uc | 84 | 517  |
| uc | 84 | 258  |
| uc | 84 | .    |
| uc | 84 | .    |
| uc | 85 | 531  |
| uc | 85 | 525  |
| uc | 85 | 618  |

|    |    |     |
|----|----|-----|
| uc | 85 | 750 |
| uc | 85 | 795 |
| uc | 86 | 535 |
| uc | 86 | 333 |
| uc | 86 | 374 |
| uc | 86 | 435 |
| uc | 86 | 433 |
| uc | 87 | 697 |
| uc | 87 | 269 |
| uc | 87 | 484 |
| uc | 87 | 619 |
| uc | 87 | 673 |
| uc | 88 | 384 |
| uc | 88 | 154 |
| uc | 88 | 570 |
| uc | 88 | 607 |
| uc | 88 | .   |
| uc | 89 | 434 |
| uc | 89 | 538 |
| uc | 89 | 584 |
| uc | 89 | 363 |
| uc | 89 | .   |
| uc | 90 | 447 |
| uc | 90 | 429 |
| uc | 90 | 410 |
| uc | 90 | 438 |
| uc | 90 | 382 |
| uc | 91 | 322 |
| uc | 91 | 439 |
| uc | 91 | 454 |
| uc | 91 | 389 |
| uc | 91 | 321 |
| uc | 92 | 244 |
| uc | 92 | 335 |
| uc | 92 | 296 |
| uc | 92 | 212 |
| uc | 92 | .   |
| uc | 93 | 343 |
| uc | 93 | 508 |
| uc | 93 | 459 |
| uc | 93 | 435 |
| uc | 93 | 520 |
| uc | 94 | 696 |
| uc | 94 | 688 |
| uc | 94 | 754 |
| uc | 94 | 594 |
| uc | 94 | 704 |
| uc | 95 | 463 |
| uc | 95 | 511 |
| uc | 95 | 771 |



|    |     |     |
|----|-----|-----|
| uc | 95  | 924 |
| uc | 95  | 630 |
| uc | 96  | 223 |
| uc | 96  | 378 |
| uc | 96  | 395 |
| uc | 96  | .   |
| uc | 96  | .   |
| uc | 97  | 284 |
| uc | 97  | 361 |
| uc | 97  | 486 |
| uc | 97  | 166 |
| uc | 97  | .   |
| uc | 98  | 469 |
| uc | 98  | 335 |
| uc | 98  | 522 |
| uc | 98  | 487 |
| uc | 98  | 627 |
| uc | 98  | .   |
| uc | 98  | .   |
| uc | 99  | 488 |
| uc | 99  | 417 |
| uc | 99  | 619 |
| uc | 99  | .   |
| uc | 99  | .   |
| uc | 686 | 325 |
| uc | 686 | 449 |
| uc | 686 | 377 |
| uc | 686 | 371 |
| uc | 686 | 301 |
| c  | 1   | 350 |
| c  | 1   | 235 |
| c  | 1   | 345 |
| c  | 1   | 333 |
| c  | 1   | 234 |
| c  | 2   | 417 |
| c  | 2   | 362 |
| c  | 2   | 337 |
| c  | 2   | 365 |
| c  | 2   | 365 |
| c  | 3   | 500 |
| c  | 3   | 530 |
| c  | 3   | 341 |
| c  | 3   | 527 |
| c  | 3   | 441 |
| c  | 4   | 262 |
| c  | 4   | 385 |
| c  | 4   | 317 |
| c  | 4   | 365 |
| c  | 4   | 312 |
| c  | 5   | 175 |

|   |    |      |
|---|----|------|
| c | 5  | 326  |
| c | 5  | 459  |
| c | 5  | 199  |
| c | 5  | 476  |
| c | 6  | 428  |
| c | 6  | 374  |
| c | 6  | 323  |
| c | 6  | 208  |
| c | 6  | 402  |
| c | 7  | 513  |
| c | 7  | 653  |
| c | 7  | 575  |
| c | 7  | 664  |
| c | 7  | 911  |
| c | 8  | 502  |
| c | 8  | 252  |
| c | 8  | 631  |
| c | 8  | 356  |
| c | 8  | 416  |
| c | 9  | 697  |
| c | 9  | 718  |
| c | 9  | 864  |
| c | 9  | 668  |
| c | 9  | 389  |
| c | 10 | 534  |
| c | 10 | 333  |
| c | 10 | 242  |
| c | 10 | 398  |
| c | 10 | 356  |
| c | 11 | 394  |
| c | 11 | 450  |
| c | 11 | 454  |
| c | 11 | 481  |
| c | 11 | 528  |
| c | 12 | 859  |
| c | 12 | 656  |
| c | 12 | 822  |
| c | 12 | 707  |
| c | 12 | 668  |
| c | 13 | 615  |
| c | 13 | 623  |
| c | 13 | 1092 |
| c | 13 | 763  |
| c | 13 | 610  |
| c | 14 | 477  |
| c | 14 | 501  |
| c | 14 | 440  |
| c | 14 | 535  |
| c | 14 | 528  |
| c | 15 | 527  |

|   |    |      |
|---|----|------|
| c | 15 | 350  |
| c | 15 | 456  |
| c | 15 | 457  |
| c | 15 | 390  |
| c | 16 | 496  |
| c | 16 | 498  |
| c | 16 | 484  |
| c | 16 | 484  |
| c | 16 | .    |
| c | 17 | 472  |
| c | 17 | 414  |
| c | 17 | 409  |
| c | 17 | 439  |
| c | 17 | 297  |
| c | 18 | 446  |
| c | 18 | 1268 |
| c | 18 | 559  |
| c | 18 | 674  |
| c | 19 | 434  |
| c | 19 | 781  |
| c | 19 | 478  |
| c | 19 | 458  |
| c | 19 | 398  |
| c | 20 | 462  |
| c | 20 | 540  |
| c | 20 | 721  |
| c | 20 | 392  |
| c | 20 | 481  |
| c | 21 | 312  |
| c | 21 | 255  |
| c | 21 | 282  |
| c | 21 | 331  |
| c | 21 | 373  |
| c | 22 | 622  |
| c | 22 | 233  |
| c | 22 | 628  |
| c | 22 | 314  |
| c | 22 | .    |
| c | 23 | 516  |
| c | 23 | 408  |
| c | 23 | 519  |
| c | 23 | 517  |
| c | 23 | 432  |
| c | 24 | 611  |
| c | 24 | 642  |
| c | 24 | 693  |
| c | 24 | 801  |
| c | 24 | 911  |
| c | 25 | 142  |
| c | 25 | 148  |

|   |    |     |
|---|----|-----|
| c | 25 | 148 |
| c | 25 | 248 |
| c | 25 | 200 |
| c | 27 | 635 |
| c | 27 | 395 |
| c | 27 | 451 |
| c | 27 | 493 |
| c | 27 | 555 |
| c | 28 | 413 |
| c | 28 | 468 |
| c | 28 | 476 |
| c | 28 | 366 |
| c | 28 | 298 |
| c | 30 | .   |
| c | 31 | 554 |
| c | 31 | 278 |
| c | 31 | 222 |
| c | 31 | 264 |
| c | 31 | 215 |
| c | 31 | 332 |
| c | 31 | 425 |
| c | 32 | 599 |
| c | 32 | 708 |
| c | 32 | 743 |
| c | 32 | 479 |
| c | 32 | 743 |
| c | 33 | 410 |
| c | 33 | 444 |
| c | 33 | 374 |
| c | 33 | 384 |
| c | 33 | .   |
| c | 34 | 423 |
| c | 34 | 550 |
| c | 34 | 310 |
| c | 35 | 392 |
| c | 35 | 264 |
| c | 35 | 412 |
| c | 35 | 211 |
| c | 35 | 242 |
| c | 36 | 502 |
| c | 36 | 582 |
| c | 36 | 702 |
| c | 36 | 334 |
| c | 36 | 493 |
| c | 36 | 652 |
| c | 37 | 472 |

|   |    |     |
|---|----|-----|
| c | 37 | 499 |
| c | 37 | 537 |
| c | 37 | 546 |
| c | 37 | 134 |
| c | 39 | .   |
| c | 40 | 570 |
| c | 40 | 360 |
| c | 40 | 366 |
| c | 40 | 264 |
| c | 40 | 248 |
| c | 41 | 425 |
| c | 41 | 491 |
| c | 41 | 505 |
| c | 41 | 705 |
| c | 41 | 598 |
| c | 42 | 224 |
| c | 42 | 363 |
| c | 42 | 417 |
| c | 42 | 488 |
| c | 42 | 507 |
| c | 43 | 429 |
| c | 43 | 934 |
| c | 43 | 419 |
| c | 43 | 538 |
| c | 43 | 379 |
| c | 44 | 360 |
| c | 44 | 279 |
| c | 44 | 301 |
| c | 44 | 402 |
| c | 44 | 486 |
| c | 45 | 324 |
| c | 45 | 333 |
| c | 45 | 189 |
| c | 45 | 158 |
| c | 46 | 506 |
| c | 46 | 448 |
| c | 46 | 475 |
| c | 46 | 533 |
| c | 47 | 404 |
| c | 47 | 801 |
| c | 47 | 609 |
| c | 47 | 730 |
| c | 47 | 497 |
| c | 48 | 199 |
| c | 48 | 426 |
| c | 48 | 434 |
| c | 48 | 461 |

|   |    |     |
|---|----|-----|
| c | 48 | .   |
| c | 49 | 236 |
| c | 49 | 262 |
| c | 49 | 233 |
| c | 50 | 437 |
| c | 50 | 358 |
| c | 50 | 330 |
| c | 50 | 272 |
| c | 50 | 482 |
| c | 51 | 458 |
| c | 51 | 301 |
| c | 51 | 337 |
| c | 51 | 377 |
| c | 51 | 337 |
| c | 52 | 712 |
| c | 52 | 526 |
| c | 52 | 569 |
| c | 52 | 815 |
| c | 52 | 761 |
| c | 53 | 342 |
| c | 53 | 401 |
| c | 53 | 236 |
| c | 53 | 407 |
| c | 53 | 258 |
| c | 55 | 515 |
| c | 55 | 423 |
| c | 55 | 419 |
| c | 55 | 454 |
| c | 55 | 483 |
| c | 56 | 349 |
| c | 56 | 223 |
| c | 56 | 283 |
| c | 56 | 299 |
| c | 56 | 239 |
| c | 57 | 287 |
| c | 57 | 356 |
| c | 57 | 326 |
| c | 57 | 91  |
| c | 57 | 327 |
| c | 58 | 654 |
| c | 58 | 581 |
| c | 58 | 581 |
| c | 58 | 557 |
| c | 58 | 408 |
| c | 59 | 812 |
| c | 59 | 548 |
| c | 59 | 919 |
| c | 59 | .   |
| c | 59 | .   |
| c | 60 | 465 |

|   |    |     |
|---|----|-----|
| c | 60 | 763 |
| c | 60 | 429 |
| c | 60 | 859 |
| c | 60 | .   |
| c | 61 | 360 |
| c | 61 | 384 |
| c | 61 | 285 |
| c | 61 | 386 |
| c | 61 | 352 |
| c | 62 | 485 |
| c | 62 | 495 |
| c | 62 | 948 |
| c | 62 | 764 |
| c | 62 | 753 |
| c | 63 | 297 |
| c | 63 | 416 |
| c | 63 | 316 |
| c | 63 | 237 |
| c | 63 | .   |
| c | 64 | 471 |
| c | 64 | 119 |
| c | 64 | 345 |
| c | 64 | 395 |
| c | 64 | 421 |
| c | 65 | 506 |
| c | 65 | 586 |
| c | 65 | 547 |
| c | 65 | 237 |
| c | 65 | 399 |
| c | 66 | 386 |
| c | 66 | 239 |
| c | 66 | 260 |
| c | 66 | 161 |
| c | 66 | 188 |
| c | 67 | 563 |
| c | 67 | 490 |
| c | 67 | 518 |
| c | 67 | 645 |
| c | 67 | 467 |
| c | 68 | 197 |
| c | 68 | 210 |
| c | 68 | 481 |
| c | 68 | 441 |
| c | 68 | 417 |
| c | 69 | .   |
| c | 70 | 247 |

|   |    |     |
|---|----|-----|
| c | 70 | 330 |
| c | 70 | 281 |
| c | 70 | 324 |
| c | 70 | 302 |
| c | 71 | 753 |
| c | 71 | 565 |
| c | 71 | 562 |
| c | 71 | 549 |
| c | 71 | 559 |
| c | 72 | 278 |
| c | 72 | 241 |
| c | 72 | .   |
| c | 72 | .   |
| c | 72 | .   |
| c | 73 | 536 |
| c | 73 | 385 |
| c | 73 | 420 |
| c | 73 | 718 |
| c | 73 | 360 |
| c | 74 | 412 |
| c | 74 | 376 |
| c | 74 | 403 |
| c | 74 | 352 |
| c | 74 | 438 |
| c | 75 | 392 |
| c | 75 | 364 |
| c | 75 | 519 |
| c | 75 | 496 |
| c | 75 | 419 |
| c | 76 | 484 |
| c | 76 | 585 |
| c | 76 | 671 |
| c | 76 | 532 |
| c | 76 | 374 |
| c | 77 | 384 |
| c | 77 | 456 |
| c | 77 | 274 |
| c | 77 | .   |
| c | 77 | .   |
| c | 78 | 468 |
| c | 78 | 450 |
| c | 78 | 323 |
| c | 78 | 520 |
| c | 78 | 382 |
| c | 79 | 519 |
| c | 79 | 394 |
| c | 79 | 462 |
| c | 79 | 530 |
| c | 79 | 443 |
| c | 80 | 370 |



|   |    |      |
|---|----|------|
| c | 80 | 376  |
| c | 80 | 413  |
| c | 80 | 437  |
| c | 80 | 386  |
| c | 81 | 205  |
| c | 81 | 294  |
| c | 81 | 248  |
| c | 81 | 165  |
| c | 81 | 207  |
| c | 82 | 572  |
| c | 82 | 274  |
| c | 82 | 427  |
| c | 82 | 921  |
| c | 82 | .    |
| c | 83 | 1130 |
| c | 83 | 549  |
| c | 83 | 993  |
| c | 83 | 877  |
| c | 83 | 949  |
| c | 84 | 392  |
| c | 84 | 480  |
| c | 84 | 450  |
| c | 84 | 552  |
| c | 84 | 508  |
| c | 85 | 595  |
| c | 85 | 459  |
| c | 85 | 903  |
| c | 85 | 784  |
| c | 85 | .    |
| c | 86 | 312  |
| c | 86 | 374  |
| c | 86 | 500  |
| c | 86 | 371  |
| c | 86 | 435  |
| c | 87 | 319  |
| c | 87 | 388  |
| c | 87 | 463  |
| c | 87 | 438  |
| c | 87 | 398  |
| c | 88 | 614  |
| c | 88 | 266  |
| c | 88 | 164  |
| c | 88 | 468  |
| c | 88 | .    |
| c | 89 | 401  |
| c | 89 | 172  |
| c | 89 | 221  |
| c | 89 | 202  |
| c | 89 | 408  |
| c | 90 | 531  |

|   |    |     |
|---|----|-----|
| c | 90 | 527 |
| c | 90 | 502 |
| c | 90 | 610 |
| c | 90 | 397 |
| c | 91 | 385 |
| c | 91 | 297 |
| c | 91 | 409 |
| c | 91 | 373 |
| c | 91 | 357 |
| c | 92 | 492 |
| c | 92 | 380 |
| c | 92 | 376 |
| c | 92 | 430 |
| c | 92 | 265 |
| c | 93 | 691 |
| c | 93 | 453 |
| c | 93 | 457 |
| c | 93 | 619 |
| c | 93 | 450 |
| c | 94 | 866 |
| c | 94 | 748 |
| c | 94 | 464 |
| c | 94 | 767 |
| c | 94 | 502 |
| c | 95 | 563 |
| c | 95 | 540 |
| c | 95 | 569 |
| c | 95 | 511 |
| c | 95 | 547 |
| c | 96 | 305 |
| c | 96 | 398 |
| c | 96 | .   |
| c | 96 | .   |
| c | 96 | .   |
| c | 97 | 558 |
| c | 97 | 808 |
| c | 97 | 340 |
| c | 97 | 612 |
| c | 97 | 417 |
| c | 98 | 373 |
| c | 98 | 353 |
| c | 98 | 538 |
| c | 98 | 541 |
| c | 98 | 563 |
| c | 98 | .   |
| c | 98 | .   |
| c | 99 | 409 |
| c | 99 | 420 |
| c | 99 | 427 |
| c | 99 | 347 |

|   |     |     |
|---|-----|-----|
| c | 99  | .   |
| c | 686 | 377 |
| c | 686 | 430 |
| c | 686 | 433 |
| c | 686 | 439 |
| c | 686 | 381 |

**Year 2 Data**

ANOVA

| SOURCE     | SS         | DF  | MS      | F      | P     |
|------------|------------|-----|---------|--------|-------|
| TRT\$      | 0.189      | 1   | 0.189   | 0.056  | 0.813 |
| LINE       | 18,243.861 | 83  | 219.806 | 65.354 | 0.000 |
| TRT\$*LINE | 911.029    | 83  | 10.976  | 3.264  | 0.000 |
| ERROR      | 2,152.515  | 640 | 3.363   |        |       |

Normality Plot

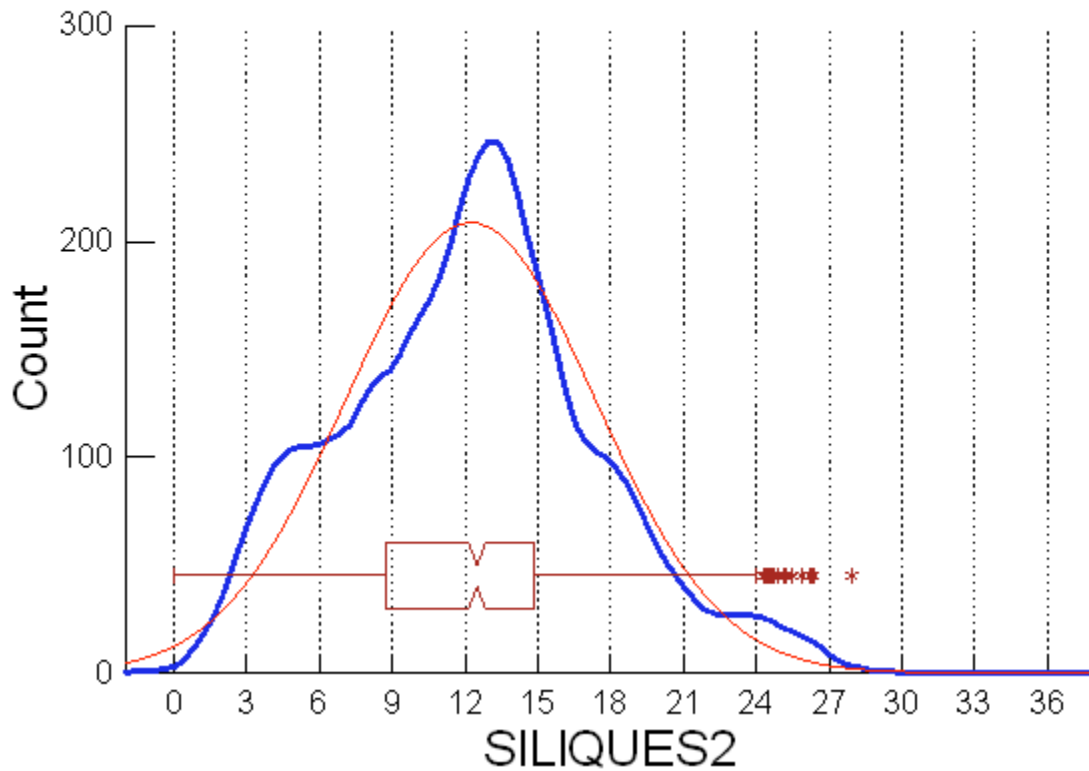

\* Data approximate normality with a sqrt transformation with homogeneity of variances (Levene's Test 0.147, p=0.702)

| <b>Clipping<br/>Treatment</b> | <b>Line</b> | <b>Siliques</b> |
|-------------------------------|-------------|-----------------|
| uc                            | 1           | 265             |
| uc                            | 1           | 221             |
| uc                            | 1           | 273             |
| uc                            | 1           | 197             |
| uc                            | 1           | 219             |
| uc                            | 2           | 295             |
| uc                            | 2           | 34              |
| uc                            | 2           | 398             |
| uc                            | 2           | 321             |
| uc                            | 2           | 442             |
| uc                            | 3           | 358             |
| uc                            | 3           | 321             |
| uc                            | 3           | 479             |
| uc                            | 3           | 354             |
| uc                            | 3           | 355             |
| uc                            | 4           | 386             |
| uc                            | 4           | 196             |
| uc                            | 4           | 241             |
| uc                            | 4           | 157             |
| uc                            | 4           | 283             |
| uc                            | 5           | 224             |
| uc                            | 5           | 402             |
| uc                            | 5           | 267             |
| uc                            | 5           | 432             |
| uc                            | 5           | 223             |
| uc                            | 6           | 172             |
| uc                            | 6           | 295             |
| uc                            | 6           | 275             |
| uc                            | 6           | 273             |
| uc                            | 6           | .               |
| uc                            | 7           | 142             |
| uc                            | 7           | 138             |
| uc                            | 7           | 147             |
| uc                            | 7           | 148             |
| uc                            | 7           | 162             |
| uc                            | 8           | 27              |
| uc                            | 8           | 35              |
| uc                            | 8           | 32              |
| uc                            | 8           | 21              |
| uc                            | 8           | 27              |
| uc                            | 9           | 21              |
| uc                            | 9           | 25              |
| uc                            | 9           | 19              |
| uc                            | 9           | 27              |
| uc                            | 9           | 26              |
| uc                            | 10          | 19              |

|    |    |     |
|----|----|-----|
| uc | 10 | 21  |
| uc | 10 | 23  |
| uc | 10 | 16  |
| uc | 10 | 17  |
| uc | 11 | 15  |
| uc | 11 | 17  |
| uc | 11 | 9   |
| uc | 11 | 8   |
| uc | 11 | 21  |
| uc | 12 | 52  |
| uc | 12 | 49  |
| uc | 12 | 61  |
| uc | 12 | 49  |
| uc | 12 | 68  |
| uc | 13 | 162 |
| uc | 13 | 178 |
| uc | 13 | 252 |
| uc | 13 | 282 |
| uc | 13 | 297 |
| uc | 14 | 193 |
| uc | 14 | 127 |
| uc | 14 | 157 |
| uc | 14 | 178 |
| uc | 14 | .   |
| uc | 15 | 57  |
| uc | 15 | 38  |
| uc | 15 | 39  |
| uc | 15 | 72  |
| uc | 15 | .   |
| uc | 16 | 175 |
| uc | 16 | 39  |
| uc | 16 | 37  |
| uc | 16 | 78  |
| uc | 16 | 79  |
| uc | 17 | 93  |
| uc | 17 | 143 |
| uc | 17 | 151 |
| uc | 17 | 171 |
| uc | 17 | 93  |
| uc | 18 | .   |
| uc | 19 | 31  |
| uc | 19 | 9   |
| uc | 19 | 27  |
| uc | 19 | 21  |
| uc | 19 | 9   |
| uc | 20 | 65  |
| uc | 20 | 73  |

|    |    |     |
|----|----|-----|
| uc | 20 | 85  |
| uc | 20 | 92  |
| uc | 20 | 78  |
| uc | 21 | 3   |
| uc | 21 | 4   |
| uc | 21 | 7   |
| uc | 21 | 4   |
| uc | 21 | 8   |
| uc | 22 | 73  |
| uc | 22 | 85  |
| uc | 22 | 97  |
| uc | 22 | 143 |
| uc | 22 | 127 |
| uc | 23 | 173 |
| uc | 23 | 184 |
| uc | 23 | 197 |
| uc | 23 | 187 |
| uc | 23 | 168 |
| uc | 24 | 142 |
| uc | 24 | 139 |
| uc | 24 | 129 |
| uc | 24 | 132 |
| uc | 24 | 133 |
| uc | 25 | 65  |
| uc | 25 | 52  |
| uc | 25 | 38  |
| uc | 25 | 109 |
| uc | 25 | 151 |
| uc | 27 | 143 |
| uc | 27 | 152 |
| uc | 27 | 161 |
| uc | 27 | 163 |
| uc | 27 | 148 |
| uc | 28 | 74  |
| uc | 28 | 38  |
| uc | 28 | 85  |
| uc | 28 | 139 |
| uc | 28 | 142 |
| uc | 30 | 41  |
| uc | 30 | 77  |
| uc | 30 | 95  |
| uc | 30 | 91  |
| uc | 30 | 57  |
| uc | 31 | 100 |
| uc | 31 | 19  |
| uc | 31 | 23  |
| uc | 31 | 33  |
| uc | 31 | 157 |
| uc | 31 | .   |
| uc | 31 | .   |

|    |    |     |
|----|----|-----|
| uc | 32 | 198 |
| uc | 32 | 237 |
| uc | 32 | 327 |
| uc | 32 | 198 |
| uc | 32 | 195 |
| uc | 33 | 65  |
| uc | 33 | 52  |
| uc | 33 | 38  |
| uc | 33 | 109 |
| uc | 33 | 151 |
| uc | 34 | .   |
| uc | 34 | .   |
| uc | 34 | .   |
| uc | 35 | .   |
| uc | 36 | 236 |
| uc | 36 | 212 |
| uc | 36 | 171 |
| uc | 36 | 619 |
| uc | 36 | .   |
| uc | 36 | .   |
| uc | 37 | 342 |
| uc | 37 | 197 |
| uc | 37 | 175 |
| uc | 37 | 182 |
| uc | 37 | 195 |
| uc | 39 | 58  |
| uc | 39 | 94  |
| uc | 39 | 17  |
| uc | 39 | 68  |
| uc | 40 | 32  |
| uc | 40 | 28  |
| uc | 40 | 37  |
| uc | 40 | 43  |
| uc | 40 | 31  |
| uc | 41 | 11  |
| uc | 41 | 8   |
| uc | 41 | 23  |
| uc | 41 | 27  |
| uc | 41 | 22  |
| uc | 42 | 27  |
| uc | 42 | 23  |
| uc | 42 | 11  |
| uc | 42 | 20  |
| uc | 42 | .   |
| uc | 43 | 17  |
| uc | 43 | 11  |

|    |    |     |
|----|----|-----|
| uc | 43 | 19  |
| uc | 43 | 21  |
| uc | 43 | 20  |
| uc | 44 | 123 |
| uc | 44 | 138 |
| uc | 44 | 142 |
| uc | 44 | 172 |
| uc | 44 | 158 |
| uc | 45 | .   |
| uc | 46 | 181 |
| uc | 46 | 98  |
| uc | 46 | 143 |
| uc | 46 | .   |
| uc | 47 | .   |
| uc | 48 | 82  |
| uc | 48 | 79  |
| uc | 48 | 83  |
| uc | 48 | 78  |
| uc | 48 | .   |
| uc | 49 | .   |
| uc | 49 | .   |
| uc | 49 | .   |
| uc | 50 | 82  |
| uc | 50 | 79  |
| uc | 50 | 83  |
| uc | 50 | 78  |
| uc | 50 | .   |
| uc | 51 | .   |
| uc | 52 | 112 |
| uc | 52 | 143 |
| uc | 52 | 153 |
| uc | 52 | 262 |
| uc | 52 | 253 |
| uc | 53 | 184 |
| uc | 53 | 192 |
| uc | 53 | 165 |
| uc | 53 | 164 |
| uc | 53 | 212 |
| uc | 55 | 29  |



|    |    |     |
|----|----|-----|
| uc | 55 | 38  |
| uc | 55 | 42  |
| uc | 55 | 57  |
| uc | 55 | .   |
| uc | 56 | .   |
| uc | 57 | 125 |
| uc | 57 | 100 |
| uc | 57 | 145 |
| uc | 57 | 137 |
| uc | 57 | 112 |
| uc | 58 | 139 |
| uc | 58 | 145 |
| uc | 58 | 178 |
| uc | 58 | 179 |
| uc | 58 | 128 |
| uc | 59 | 112 |
| uc | 59 | 120 |
| uc | 59 | 138 |
| uc | 59 | 115 |
| uc | 59 | 125 |
| uc | 60 | 110 |
| uc | 60 | 110 |
| uc | 60 | 95  |
| uc | 60 | 85  |
| uc | 60 | 90  |
| uc | 61 | .   |
| uc | 62 | 138 |
| uc | 62 | 127 |
| uc | 62 | 243 |
| uc | 62 | 190 |
| uc | 62 | .   |
| uc | 63 | 65  |
| uc | 63 | 195 |
| uc | 63 | 204 |
| uc | 63 | 85  |
| uc | 63 | 95  |
| uc | 64 | 192 |
| uc | 64 | 305 |
| uc | 64 | 319 |
| uc | 64 | 303 |
| uc | 64 | 140 |
| uc | 65 | 164 |

|    |    |     |
|----|----|-----|
| uc | 65 | 138 |
| uc | 65 | 184 |
| uc | 65 | 192 |
| uc | 65 | 187 |
| uc | 66 | 21  |
| uc | 66 | 198 |
| uc | 66 | 252 |
| uc | 66 | 141 |
| uc | 66 | 142 |
| uc | 67 | .   |
| uc | 68 | 321 |
| uc | 68 | 298 |
| uc | 68 | 282 |
| uc | 68 | 341 |
| uc | 68 | 328 |
| uc | 69 | 98  |
| uc | 69 | 185 |
| uc | 69 | 98  |
| uc | 69 | 137 |
| uc | 69 | 115 |
| uc | 70 | 192 |
| uc | 70 | 245 |
| uc | 70 | 102 |
| uc | 70 | 182 |
| uc | 70 | 29  |
| uc | 71 | 182 |
| uc | 71 | 195 |
| uc | 71 | 193 |
| uc | 71 | 215 |
| uc | 71 | .   |
| uc | 72 | 43  |
| uc | 72 | 39  |
| uc | 72 | 51  |
| uc | 72 | 63  |
| uc | 72 | .   |
| uc | 73 | 93  |
| uc | 73 | 182 |
| uc | 73 | 172 |
| uc | 73 | 161 |
| uc | 73 | 159 |
| uc | 74 | 215 |
| uc | 74 | 178 |
| uc | 74 | .   |
| uc | 74 | .   |
| uc | 74 | .   |
| uc | 75 | 215 |

|    |    |     |
|----|----|-----|
| uc | 75 | 162 |
| uc | 75 | 172 |
| uc | 75 | 153 |
| uc | 75 | 142 |
| uc | 76 | .   |
| uc | 77 | 142 |
| uc | 77 | 153 |
| uc | 77 | 162 |
| uc | 77 | 172 |
| uc | 77 | 182 |
| uc | 78 | 185 |
| uc | 78 | 192 |
| uc | 78 | 165 |
| uc | 78 | 172 |
| uc | 78 | 165 |
| uc | 79 | 212 |
| uc | 79 | 273 |
| uc | 79 | 315 |
| uc | 79 | 371 |
| uc | 79 | 324 |
| uc | 80 | 92  |
| uc | 80 | 185 |
| uc | 80 | 295 |
| uc | 80 | 254 |
| uc | 80 | 261 |
| uc | 81 | 78  |
| uc | 81 | 87  |
| uc | 81 | 93  |
| uc | 81 | 85  |
| uc | 81 | 79  |
| uc | 82 | 224 |
| uc | 82 | 294 |
| uc | 82 | 187 |
| uc | 82 | 195 |
| uc | 82 | 270 |
| uc | 83 | 632 |
| uc | 83 | 694 |
| uc | 83 | 687 |
| uc | 83 | 609 |
| uc | 83 | 603 |
| uc | 84 | 390 |
| uc | 84 | 398 |
| uc | 84 | 331 |
| uc | 84 | 410 |
| uc | 84 | 321 |
| uc | 85 | 670 |

|    |    |     |
|----|----|-----|
| uc | 85 | 598 |
| uc | 85 | 611 |
| uc | 85 | 610 |
| uc | 85 | 611 |
| uc | 86 | 110 |
| uc | 86 | 65  |
| uc | 86 | 79  |
| uc | 86 | 84  |
| uc | 86 | 95  |
| uc | 87 | 45  |
| uc | 87 | 53  |
| uc | 87 | 42  |
| uc | 87 | 40  |
| uc | 87 | 55  |
| uc | 88 | 85  |
| uc | 88 | 93  |
| uc | 88 | 170 |
| uc | 88 | 150 |
| uc | 88 | 160 |
| uc | 89 | 621 |
| uc | 89 | 385 |
| uc | 89 | 529 |
| uc | 89 | 650 |
| uc | 89 | 780 |
| uc | 90 | .   |
| uc | 91 | 85  |
| uc | 91 | 93  |
| uc | 91 | 89  |
| uc | 91 | 115 |
| uc | 91 | .   |
| uc | 92 | 139 |
| uc | 92 | 142 |
| uc | 92 | 134 |
| uc | 92 | 137 |
| uc | 92 | 142 |
| uc | 93 | 380 |
| uc | 93 | 342 |
| uc | 93 | 451 |
| uc | 93 | 371 |
| uc | 93 | 383 |
| uc | 94 | 210 |
| uc | 94 | 212 |
| uc | 94 | 195 |
| uc | 94 | 183 |
| uc | 94 | .   |
| uc | 95 | 198 |

|    |     |     |
|----|-----|-----|
| uc | 95  | 183 |
| uc | 95  | .   |
| uc | 95  | .   |
| uc | 95  | .   |
| uc | 96  | 195 |
| uc | 96  | 38  |
| uc | 96  | 55  |
| uc | 96  | 55  |
| uc | 96  | 193 |
| uc | 97  | 199 |
| uc | 97  | 238 |
| uc | 97  | 183 |
| uc | 97  | 209 |
| uc | 97  | 241 |
| uc | 98  | 65  |
| uc | 98  | 115 |
| uc | 98  | 140 |
| uc | 98  | .   |
| uc | 99  | 398 |
| uc | 99  | 497 |
| uc | 99  | 512 |
| uc | 99  | 495 |
| uc | 99  | 512 |
| uc | 686 | 249 |
| uc | 686 | 288 |
| uc | 686 | 233 |
| uc | 686 | 259 |
| uc | 686 | 291 |
| c  | 1   | 127 |
| c  | 1   | 132 |
| c  | 1   | 129 |
| c  | 1   | 163 |
| c  | 1   | 159 |
| c  | 2   | 417 |
| c  | 2   | 362 |
| c  | 2   | 337 |
| c  | 2   | 365 |
| c  | 2   | 365 |
| c  | 3   | 500 |
| c  | 3   | 530 |
| c  | 3   | 341 |
| c  | 3   | 527 |
| c  | 3   | 441 |
| c  | 4   | 262 |
| c  | 4   | 385 |
| c  | 4   | 317 |
| c  | 4   | 365 |

|   |    |     |
|---|----|-----|
| c | 4  | 312 |
| c | 5  | 175 |
| c | 5  | 326 |
| c | 5  | 459 |
| c | 5  | 199 |
| c | 5  | 476 |
| c | 6  | 173 |
| c | 6  | 295 |
| c | 6  | 298 |
| c | 6  | 275 |
| c | 6  | 296 |
| c | 7  | 195 |
| c | 7  | 205 |
| c | 7  | 195 |
| c | 7  | 198 |
| c | 7  | 210 |
| c | 8  | 31  |
| c | 8  | 29  |
| c | 8  | 23  |
| c | 8  | 15  |
| c | 8  | 29  |
| c | 9  | 21  |
| c | 9  | 12  |
| c | 9  | 9   |
| c | 9  | 8   |
| c | 9  | 7   |
| c | 10 | 17  |
| c | 10 | 21  |
| c | 10 | 19  |
| c | 10 | 19  |
| c | 10 | 21  |
| c | 11 | 21  |
| c | 11 | 19  |
| c | 11 | 22  |
| c | 11 | 17  |
| c | 11 | 12  |
| c | 12 | 59  |
| c | 12 | 38  |
| c | 12 | 35  |
| c | 12 | 27  |
| c | 12 | 21  |
| c | 13 | 198 |
| c | 13 | 297 |
| c | 13 | 312 |
| c | 13 | 275 |
| c | 13 | 283 |
| c | 14 | 198 |
| c | 14 | 187 |
| c | 14 | 190 |
| c | 14 | 209 |

|   |    |     |
|---|----|-----|
| c | 14 | 207 |
| c | 15 | 75  |
| c | 15 | 67  |
| c | 15 | 39  |
| c | 15 | 74  |
| c | 15 | 83  |
| c | 16 | 93  |
| c | 16 | 87  |
| c | 16 | 137 |
| c | 16 | 83  |
| c | 16 | .   |
| c | 17 | 87  |
| c | 17 | 193 |
| c | 17 | 129 |
| c | 17 | 152 |
| c | 17 | 72  |
| c | 18 | .   |
| c | 19 | 15  |
| c | 19 | 8   |
| c | 19 | 12  |
| c | 19 | 9   |
| c | 19 | 23  |
| c | 20 | 92  |
| c | 20 | 78  |
| c | 20 | 73  |
| c | 20 | 72  |
| c | 20 | 65  |
| c | 21 | 21  |
| c | 21 | 9   |
| c | 21 | 23  |
| c | 21 | 21  |
| c | 21 | 17  |
| c | 22 | 239 |
| c | 22 | 198 |
| c | 22 | 157 |
| c | 22 | 193 |
| c | 22 | 183 |
| c | 23 | 195 |
| c | 23 | 139 |
| c | 23 | 294 |
| c | 23 | 233 |
| c | 23 | 242 |
| c | 24 | 172 |
| c | 24 | 178 |
| c | 24 | 175 |
| c | 24 | 162 |
| c | 24 | 173 |

|   |    |     |
|---|----|-----|
| c | 25 | 49  |
| c | 25 | 114 |
| c | 25 | 66  |
| c | 25 | 225 |
| c | 25 | 55  |
| c | 27 | 183 |
| c | 27 | 147 |
| c | 27 | 185 |
| c | 27 | 176 |
| c | 27 | 221 |
| c | 28 | 135 |
| c | 28 | 143 |
| c | 28 | 257 |
| c | 28 | 133 |
| c | 28 | 143 |
| c | 30 | 61  |
| c | 30 | 69  |
| c | 30 | 66  |
| c | 30 | 51  |
| c | 30 | 50  |
| c | 31 | 30  |
| c | 31 | 193 |
| c | 31 | 21  |
| c | 31 | 45  |
| c | 31 | 109 |
| c | 31 | .   |
| c | 31 | .   |
| c | 32 | 198 |
| c | 32 | 207 |
| c | 32 | 172 |
| c | 32 | 185 |
| c | 32 | 205 |
| c | 33 | 49  |
| c | 33 | 114 |
| c | 33 | 66  |
| c | 33 | 225 |
| c | 33 | 55  |
| c | 34 | .   |
| c | 34 | .   |
| c | 34 | .   |
| c | 35 | .   |
| c | 36 | 172 |
| c | 36 | 138 |
| c | 36 | 0   |
| c | 36 | 310 |
| c | 36 | .   |



|   |    |     |
|---|----|-----|
| c | 36 | .   |
| c | 37 | 304 |
| c | 37 | 297 |
| c | 37 | 198 |
| c | 37 | 142 |
| c | 37 | 151 |
| c | 39 | 58  |
| c | 39 | 39  |
| c | 39 | 83  |
| c | 39 | 39  |
| c | 40 | 8   |
| c | 40 | 15  |
| c | 40 | 4   |
| c | 40 | 11  |
| c | 40 | 9   |
| c | 41 | 31  |
| c | 41 | 27  |
| c | 41 | 21  |
| c | 41 | 11  |
| c | 41 | 43  |
| c | 42 | 11  |
| c | 42 | 15  |
| c | 42 | 16  |
| c | 42 | 9   |
| c | 42 | 15  |
| c | 43 | 11  |
| c | 43 | 11  |
| c | 43 | 8   |
| c | 43 | 15  |
| c | 43 | 21  |
| c | 44 | 142 |
| c | 44 | 132 |
| c | 44 | 132 |
| c | 44 | 141 |
| c | 44 | 152 |
| c | 45 | .   |
| c | 46 | 38  |
| c | 46 | 217 |
| c | 46 | 198 |
| c | 46 | 175 |
| c | 47 | .   |
| c | 48 | 103 |
| c | 48 | 97  |

|   |    |     |
|---|----|-----|
| c | 48 | 98  |
| c | 48 | 73  |
| c | 48 | 62  |
| c | 49 | .   |
| c | 49 | .   |
| c | 49 | .   |
| c | 50 | 103 |
| c | 50 | 97  |
| c | 50 | 98  |
| c | 50 | 73  |
| c | 50 | 62  |
| c | 51 | .   |
| c | 52 | 85  |
| c | 52 | 250 |
| c | 52 | 197 |
| c | 52 | 183 |
| c | 52 | 284 |
| c | 53 | 158 |
| c | 53 | 142 |
| c | 53 | 162 |
| c | 53 | 239 |
| c | 53 | 284 |
| c | 55 | 65  |
| c | 55 | 64  |
| c | 55 | 54  |
| c | 55 | 56  |
| c | 55 | 71  |
| c | 56 | .   |
| c | 57 | 98  |
| c | 57 | 112 |
| c | 57 | 138 |
| c | 57 | 150 |
| c | 57 | 120 |
| c | 58 | 129 |
| c | 58 | 135 |
| c | 58 | 214 |
| c | 58 | 182 |
| c | 58 | 179 |
| c | 59 | 130 |
| c | 59 | 145 |
| c | 59 | 98  |
| c | 59 | 110 |

|   |    |     |
|---|----|-----|
| c | 59 | 130 |
| c | 60 | 60  |
| c | 60 | 78  |
| c | 60 | 97  |
| c | 60 | 65  |
| c | 60 | 75  |
| c | 61 | .   |
| c | 62 | 225 |
| c | 62 | 220 |
| c | 62 | 212 |
| c | 62 | 240 |
| c | 62 | .   |
| c | 63 | 98  |
| c | 63 | 108 |
| c | 63 | 392 |
| c | 63 | 294 |
| c | 63 | 407 |
| c | 64 | 198 |
| c | 64 | 265 |
| c | 64 | 232 |
| c | 64 | 211 |
| c | 64 | 187 |
| c | 65 | 241 |
| c | 65 | 292 |
| c | 65 | 141 |
| c | 65 | 183 |
| c | 65 | 271 |
| c | 66 | 138 |
| c | 66 | 141 |
| c | 66 | 197 |
| c | 66 | 138 |
| c | 66 | 142 |
| c | 67 | .   |
| c | 68 | 168 |
| c | 68 | 175 |
| c | 68 | 207 |
| c | 68 | 168 |
| c | 68 | 182 |
| c | 69 | 147 |
| c | 69 | 153 |
| c | 69 | 162 |
| c | 69 | 184 |

|   |    |     |
|---|----|-----|
| c | 69 | 115 |
| c | 70 | 102 |
| c | 70 | 215 |
| c | 70 | 314 |
| c | 70 | 275 |
| c | 70 | 185 |
| c | 71 | 198 |
| c | 71 | 152 |
| c | 71 | 172 |
| c | 71 | 168 |
| c | 71 | 212 |
| c | 72 | 197 |
| c | 72 | 271 |
| c | 72 | 362 |
| c | 72 | 209 |
| c | 72 | 198 |
| c | 73 | 182 |
| c | 73 | 197 |
| c | 73 | 154 |
| c | 73 | 182 |
| c | 73 | 215 |
| c | 74 | 185 |
| c | 74 | 292 |
| c | 74 | 178 |
| c | 74 | .   |
| c | 74 | .   |
| c | 75 | 240 |
| c | 75 | 175 |
| c | 75 | 182 |
| c | 75 | 212 |
| c | 75 | 215 |
| c | 76 | .   |
| c | 77 | 304 |
| c | 77 | 98  |
| c | 77 | 158 |
| c | 77 | 142 |
| c | 77 | 163 |
| c | 78 | 262 |
| c | 78 | 292 |
| c | 78 | 263 |
| c | 78 | 198 |
| c | 78 | 212 |
| c | 79 | 351 |
| c | 79 | 323 |
| c | 79 | 347 |
| c | 79 | 410 |

|   |    |     |
|---|----|-----|
| c | 79 | 225 |
| c | 80 | 208 |
| c | 80 | 275 |
| c | 80 | 308 |
| c | 80 | 185 |
| c | 80 | 165 |
| c | 81 | 104 |
| c | 81 | 97  |
| c | 81 | 102 |
| c | 81 | 105 |
| c | 81 | 97  |
| c | 82 | 304 |
| c | 82 | 297 |
| c | 82 | 360 |
| c | 82 | 307 |
| c | 82 | 337 |
| c | 83 | 621 |
| c | 83 | 610 |
| c | 83 | 590 |
| c | 83 | 691 |
| c | 83 | 638 |
| c | 84 | 450 |
| c | 84 | 441 |
| c | 84 | 495 |
| c | 84 | 391 |
| c | 84 | 398 |
| c | 85 | 598 |
| c | 85 | 541 |
| c | 85 | 595 |
| c | 85 | 591 |
| c | 85 | 575 |
| c | 86 | 78  |
| c | 86 | 83  |
| c | 86 | 76  |
| c | 86 | 79  |
| c | 86 | 65  |
| c | 87 | 45  |
| c | 87 | 65  |
| c | 87 | 23  |
| c | 87 | 71  |
| c | 87 | 76  |
| c | 88 | 98  |
| c | 88 | 97  |
| c | 88 | 65  |
| c | 88 | 90  |
| c | 88 | 125 |
| c | 89 | 209 |
| c | 89 | 308 |
| c | 89 | 304 |
| c | 89 | 382 |

|   |    |     |
|---|----|-----|
| c | 89 | 401 |
| c | 90 | .   |
| c | 91 | 205 |
| c | 91 | 198 |
| c | 91 | 197 |
| c | 91 | 155 |
| c | 91 | 183 |
| c | 92 | 179 |
| c | 92 | 182 |
| c | 92 | 192 |
| c | 92 | 173 |
| c | 92 | 152 |
| c | 93 | 408 |
| c | 93 | 491 |
| c | 93 | 507 |
| c | 93 | 492 |
| c | 93 | 498 |
| c | 94 | 195 |
| c | 94 | 183 |
| c | 94 | 183 |
| c | 94 | 215 |
| c | 94 | 216 |
| c | 95 | 98  |
| c | 95 | 195 |
| c | 95 | .   |
| c | 95 | .   |
| c | 95 | .   |
| c | 96 | 158 |
| c | 96 | 175 |
| c | 96 | 130 |
| c | 96 | 195 |
| c | 96 | 212 |
| c | 97 | 365 |
| c | 97 | 327 |
| c | 97 | 336 |
| c | 97 | 355 |
| c | 97 | 342 |
| c | 98 | 135 |
| c | 98 | 193 |
| c | 98 | 185 |
| c | 98 | 193 |
| c | 98 | 192 |
| c | 98 | 98  |
| c | 98 | 95  |
| c | 99 | 308 |
| c | 99 | 316 |

|   |     |     |
|---|-----|-----|
| c | 99  | 372 |
| c | 99  | 298 |
| c | 99  | 345 |
| c | 686 | 355 |
| c | 686 | 337 |
| c | 686 | 336 |
| c | 686 | 355 |
| c | 686 | 342 |

### III. Transcriptomic Data

<http://www.ncbi.nlm.nih.gov/geo/query/acc.cgi?acc=GSE44781>

#### List of differentially expressed genes

| Number | Microarray Element | Gene                      |
|--------|--------------------|---------------------------|
| 1      | 262038_at          | <a href="#">AT1G35580</a> |
| 2      | 267516_at          | <a href="#">AT2G30520</a> |
| 3      | 251028_at          | <a href="#">AT5G02230</a> |
| 4      | 258448_at          | <a href="#">AT3G22290</a> |
| 5      | 252308_at          | <a href="#">AT3G49310</a> |
| 6      | 264501_at          | <a href="#">AT1G09390</a> |
| 7      | 264977_at          | <a href="#">AT1G27090</a> |
| 8      | 247353_at          | <a href="#">AT5G63620</a> |
| 9      | 245817_at          | <a href="#">AT1G26160</a> |
| 10     | 265953_at          | <a href="#">AT2G37480</a> |
| 11     | 246320_at          | <a href="#">AT1G16560</a> |
| 12     | 247553_at          | <a href="#">AT5G60910</a> |
| 13     | 247694_at          | <a href="#">AT5G59750</a> |
| 14     | 254270_at          | <a href="#">AT4G23100</a> |
| 15     | 255417_at          | <a href="#">AT4G03190</a> |
| 16     | 248551_at          | <a href="#">AT5G50200</a> |
| 17     | 253964_at          | <a href="#">AT4G26480</a> |
| 18     | 250895_at          | <a href="#">AT5G03850</a> |
| 19     | 249694_at          | <a href="#">AT5G35790</a> |
| 20     | 260395_at          | <a href="#">AT1G69780</a> |
| 21     | 257148_at          | <a href="#">AT3G27240</a> |
| 22     | 265227_s_at        | <a href="#">ATMG01280</a> |
|        |                    | <a href="#">AT2G07695</a> |
| 23     | 245790_at          | <a href="#">AT1G32200</a> |
| 24     | 260821_at          | <a href="#">AT1G06820</a> |
| 25     | 262059_at          | <a href="#">AT1G80030</a> |
| 26     | 266465_at          | <a href="#">AT2G47750</a> |
| 27     | 255148_at          | <a href="#">AT4G08470</a> |
| 28     | 265228_at          | <a href="#">ATMG01190</a> |
|        |                    | <a href="#">AT2G07698</a> |
| 29     | 264871_at          | <a href="#">AT1G24180</a> |
| 30     | 246745_at          | <a href="#">AT5G27770</a> |
| 31     | 255797_at          | <a href="#">AT2G33630</a> |

|    |             |                                     |
|----|-------------|-------------------------------------|
| 32 | 252290_at   | <a href="#">AT3G49140</a>           |
| 33 | 250382_at   | <a href="#">AT5G11580</a>           |
| 34 | 247433_at   | <a href="#">AT5G62540</a>           |
| 35 | 252960_at   | <a href="#">AT4G38750</a>           |
| 36 | 253243_at   | <a href="#">AT4G34560</a>           |
| 37 | 251666_at   | <a href="#">AT3G57050</a>           |
| 38 | 248309_at   | <a href="#">AT5G52540</a>           |
| 39 | 251082_at   | <a href="#">AT5G11580</a>           |
| 40 | 254306_at   | <a href="#">AT4G22330</a>           |
| 41 | 247131_at   | <a href="#">AT5G66190</a>           |
| 42 | 263014_at   | <a href="#">AT1G23400</a>           |
| 43 | 264095_at   | <a href="#">AT1G79230</a>           |
| 44 | 256502_at   | <a href="#">AT1G36730</a>           |
| 45 | 260536_at   | <a href="#">AT2G43400</a>           |
| 46 | 266904_at   | <a href="#">AT2G34590</a>           |
| 47 | 267609_at   | <a href="#">AT2G26780</a>           |
| 48 | 248094_at   | <a href="#">AT5G55220</a>           |
| 49 | 248103_at   | <a href="#">AT5G55160</a>           |
| 50 | 260286_at   | <a href="#">AT1G80600</a>           |
| 51 | 253035_at   | <a href="#">AT2G38400</a>           |
| 52 | 263973_at   | <a href="#">AT2G42740</a>           |
| 53 | 265817_at   | <a href="#">AT2G18050</a>           |
| 54 | 267035_at   | <a href="#">AT4G38240</a>           |
| 55 | 253886_at   | <a href="#">AT4G27710</a>           |
| 56 | 260896_at   | <a href="#">AT1G29310</a>           |
| 57 | 249900_at   | <a href="#">AT5G22640</a>           |
| 58 | 256193_at   | <a href="#">AT1G30200</a>           |
| 59 | 249538_at   | <a href="#">AT5G38840</a>           |
| 60 | 259258_at   | <a href="#">AT3G07670</a>           |
| 61 | 261408_s_at | <a href="#">AT1G07660</a>           |
|    |             | <a href="#">AT1G07820</a>           |
| 62 | 244939_at   | <a href="#">ATCG00065</a>           |
| 63 | 251449_at   | <a href="#">AT3G59920</a>           |
| 64 | 253779_at   | <a href="#">AT4G28490</a>           |
| 65 | 261944_at   | <a href="#">AT1G64650</a>           |
| 66 | 257903_at   | <a href="#">AT3G28460</a>           |
| 67 | 264353_at   | <a href="#">AT1G03260</a>           |
| 68 | 251409_at   | <a href="#">AT3G60245</a>           |
| 69 | 263755_at   | <a href="#">AT2G21340</a>           |
| 70 | 245269_at   | <a href="#">AT4G14500</a>           |
| 71 | 245627_at   | <a href="#">AT1G56600</a>           |
| 72 | 253164_at   | <a href="#">AT4G35725</a>           |
| 73 | 250318_at   | <a href="#">AT5G12200</a>           |
| 74 | 250434_at   | <a href="#">AT5G10390</a>           |
| 75 | 252562_s_at | <a href="#">AT3G46320</a>           |
|    |             | <a href="#">AT3G45930 AT3G46320</a> |
| 76 | 262963_at   | <a href="#">AT1G54220</a>           |
| 77 | 256729_at   | <a href="#">AT3G25680</a>           |
| 78 | 260571_at   | <a href="#">AT2G43790</a>           |
| 79 | 261557_at   | <a href="#">AT1G63640</a>           |



|     |             |                                     |
|-----|-------------|-------------------------------------|
| 80  | 266638_at   | <a href="#">AT2G35490</a>           |
| 81  | 258922_at   | <a href="#">AT3G10610</a>           |
| 82  | 245263_at   | <a href="#">AT4G17740</a>           |
| 83  | 264262_at   | <a href="#">AT1G09200</a>           |
| 84  | 253704_at   | <a href="#">AT4G29490</a>           |
| 85  | 247260_at   | <a href="#">AT5G64500</a>           |
| 86  | 257431_at   | <a href="#">AT2G36360</a>           |
| 87  | 262985_s_at | <a href="#">AT1G70600</a>           |
|     |             | <a href="#">AT1G23290 AT1G70600</a> |
| 88  | 247140_at   | <a href="#">AT5G66250</a>           |
| 89  | 258766_at   | <a href="#">AT3G10700</a>           |
| 90  | 245176_at   | <a href="#">AT2G47440</a>           |
| 91  | 247925_at   | <a href="#">AT5G57560</a>           |
| 92  | 258755_at   | <a href="#">AT3G11945</a>           |
| 93  | 261424_at   | <a href="#">AT1G18700</a>           |
| 94  | 262174_at   | <a href="#">AT1G74910</a>           |
| 95  | 264454_at   | <a href="#">AT1G10320</a>           |
| 96  | 266438_at   | <a href="#">AT2G43180</a>           |
| 97  | 260510_at   | <a href="#">AT1G51580</a>           |
| 98  | 248676_at   | <a href="#">AT5G48850</a>           |
| 99  | 255537_at   | <a href="#">AT4G01690</a>           |
| 100 | 267517_at   | <a href="#">AT2G30520</a>           |
| 101 | 257215_at   | <a href="#">AT3G15070</a>           |
| 102 | 248669_at   | <a href="#">AT5G48730</a>           |
| 103 | 245284_at   | <a href="#">AT4G14210</a>           |
| 104 | 247306_at   | <a href="#">AT5G63870</a>           |
| 105 | 252235_at   | <a href="#">AT3G49910</a>           |
| 106 | 259193_at   | <a href="#">AT3G01480</a>           |
| 107 | 250941_at   | <a href="#">AT5G03320</a>           |
| 108 | 265735_at   | <a href="#">AT2G01140</a>           |
| 109 | 264421_at   | <a href="#">AT1G43170</a>           |

#### IV. Knockout mutant data

##### ANOVA

| Source     | SS      | DF  | MS     | F     | P     |
|------------|---------|-----|--------|-------|-------|
| Trt        | 1.494   | 1   | 1.494  | 0.471 | 0.494 |
| Line       | 126.048 | 4   | 31.512 | 9.928 | 0.000 |
| Trt * Line | 28.013  | 4   | 7.003  | 2.206 | 0.073 |
| Error      | 361.824 | 114 | 3.174  |       |       |

| Effect    | trt | line     | trt | line     | P     |
|-----------|-----|----------|-----|----------|-------|
| trt*line  | c   | sail1252 | uc  | sail1252 | 0.471 |
| trt*line  | c   | salk0193 | uc  | salk0193 | 0.419 |
| trt*line  | c   | Gabi864  | uc  | Gabi864  | 0.265 |
| trt *line | c   | col      | uc  | col      | 0.019 |
| trt*line  | c   | ler      | uc  | ler      | 0.094 |

#### Normality Plot

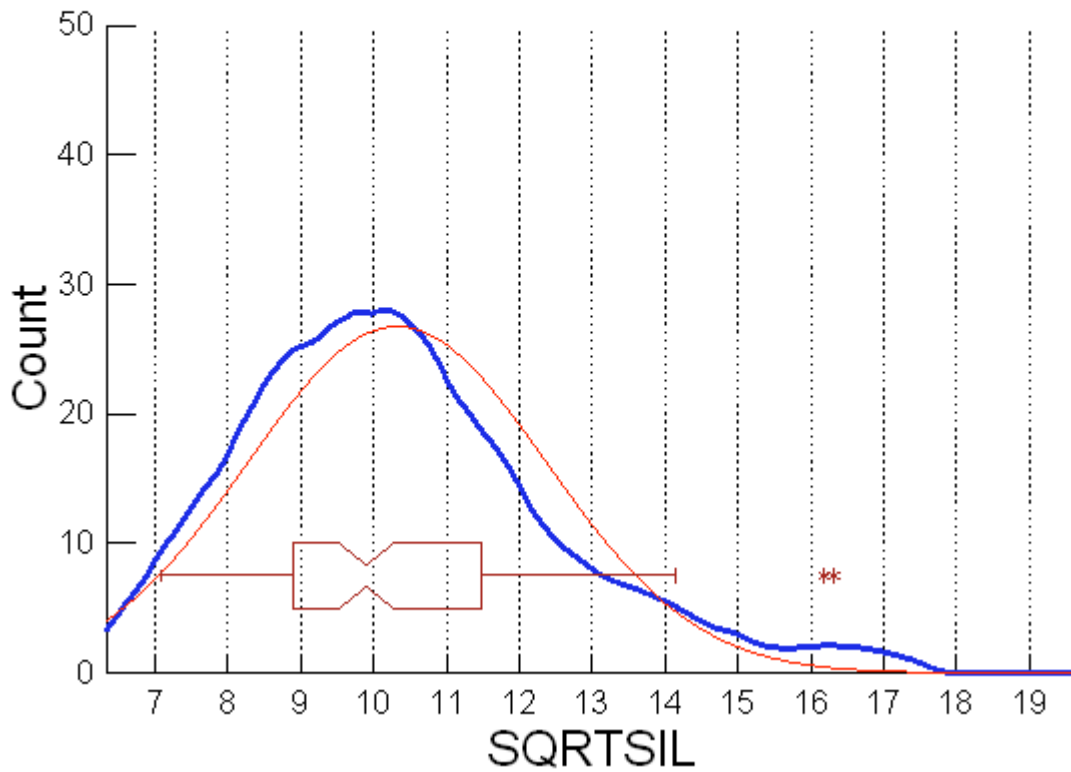

\* Data approximate normality with sqrt transformation with homogeneity of variances (Levene's Test .203, p=0.653).

| <b>Treatment</b> | <b>Line</b> | <b>Siliques</b> |
|------------------|-------------|-----------------|
| c                | sail1252    | 89              |
| c                | sail1252    | 92              |
| c                | sail1252    | 91              |
| c                | sail1252    | 70              |
| c                | sail1252    | 89              |
| c                | sail1252    | 78              |
| c                | sail1252    | 63              |
| c                | sail1252    | 133             |
| c                | sail1252    | 59              |
| c                | sail1252    | 89              |
| c                | sail1252    | 92              |
| c                | sail1252    | 91              |
| c                | sail1252    | 70              |
| c                | sail1252    | 89              |
| c                | sail1252    | 78              |
| c                | sail1252    | 63              |
| c                | sail1252    | 133             |
| c                | sail1252    | 59              |
| uc               | sail1252    | 70              |
| uc               | sail1252    | 79              |
| uc               | sail1252    | 95              |
| uc               | sail1252    | 98              |
| uc               | sail1252    | 112             |
| uc               | sail1252    | 98              |
| uc               | sail1252    | 132             |
| uc               | sail1252    | 89              |
| uc               | sail1252    | 59              |
| uc               | sail1252    | 70              |
| uc               | sail1252    | 79              |
| uc               | sail1252    | 95              |
| uc               | sail1252    | 98              |
| uc               | sail1252    | 112             |
| uc               | sail1252    | 98              |
| uc               | sail1252    | 132             |
| uc               | sail1252    | 89              |
| uc               | sail1252    | 59              |
| c                | salk019323  | 83              |
| c                | salk019323  | 102             |
| c                | salk019323  | 123             |
| c                | salk019323  | 98              |
| c                | salk019323  | 71              |
| c                | salk019323  | 59              |
| c                | salk019323  | 65              |
| c                | salk019323  | 83              |
| c                | salk019323  | 102             |
| c                | salk019323  | 123             |

|    |            |     |
|----|------------|-----|
| c  | salk019323 | 98  |
| c  | salk019323 | 71  |
| c  | salk019323 | 59  |
| c  | salk019323 | 65  |
| uc | salk019323 | 125 |
| uc | salk019323 | 79  |
| uc | salk019323 | 92  |
| uc | salk019323 | 88  |
| uc | salk019323 | 92  |
| uc | salk019323 | 98  |
| uc | salk019323 | 89  |
| uc | salk019323 | 125 |
| uc | salk019323 | 79  |
| uc | salk019323 | 92  |
| uc | salk019323 | 88  |
| uc | salk019323 | 92  |
| uc | salk019323 | 98  |
| uc | salk019323 | 89  |
| c  | N173950    | 200 |
| c  | N173950    | 81  |
| c  | N173950    | 57  |
| c  | N173950    | 57  |
| c  | N173950    | 188 |
| c  | N173950    | 106 |
| c  | N173950    | 200 |
| c  | N173950    | 81  |
| c  | N173950    | 57  |
| c  | N173950    | 57  |
| c  | N173950    | 188 |
| c  | N173950    | 106 |
| uc | N173950    | 139 |
| uc | N173950    | 262 |
| uc | N173950    | 266 |
| uc | N173950    | 71  |
| uc | N173950    | 50  |
| uc | N173950    | 50  |
| uc | N173950    | 139 |
| uc | N173950    | 262 |
| uc | N173950    | 266 |
| uc | N173950    | 71  |
| uc | N173950    | 50  |
| uc | N173950    | 50  |
| c  | col        | 193 |
| c  | col        | 159 |
| c  | col        | 152 |
| c  | col        | 187 |
| c  | col        | 149 |
| c  | col        | 165 |
| c  | col        | 186 |
| c  | col        | 115 |

|    |     |     |
|----|-----|-----|
| c  | col | 171 |
| uc | col | 106 |
| uc | col | 119 |
| uc | col | 116 |
| uc | col | 119 |
| uc | col | 118 |
| uc | col | 128 |
| uc | col | 132 |
| uc | col | 112 |
| uc | col | 119 |
| c  | ler | 133 |
| c  | ler | 125 |
| c  | ler | 115 |
| c  | ler | 119 |
| c  | ler | 115 |
| c  | ler | 142 |
| c  | ler | 112 |
| c  | ler | 111 |
| c  | ler | 89  |
| uc | ler | 125 |
| uc | ler | 190 |
| uc | ler | 147 |
| uc | ler | 132 |
| uc | ler | 162 |
| uc | ler | 197 |
| uc | ler | 114 |
| uc | ler | 137 |
| uc | ler | 140 |

## V. Complementation Data

Analysis of Variance

| Source   | Type III SS | df | Mean Squares | F-Ratio | p-Value |
|----------|-------------|----|--------------|---------|---------|
| TREATM\$ | 1,036.80    | 1  | 1,036.80     | 3.901   | 0.064   |
| Error    | 4,784.20    | 18 | 265.789      |         |         |

Normality Plot

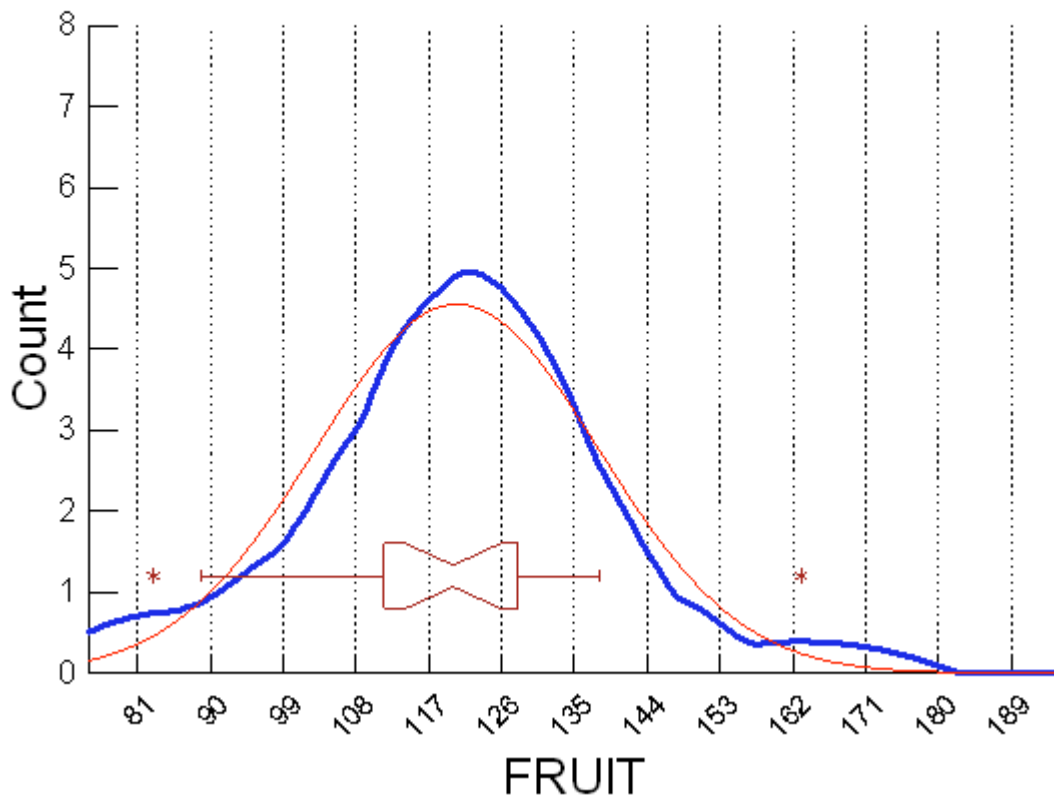

\* Data normally distributed with homogeneity of variances (Levene's Test .119,  $p=0.734$ ).

| Treatment | Siliques |
|-----------|----------|
| C         | 138      |
| C         | 128      |
| C         | 137      |
| C         | 118      |
| C         | 105      |
| C         | 117      |

|    |     |
|----|-----|
| C  | 119 |
| C  | 163 |
| C  | 124 |
| C  | 128 |
| Uc | 128 |
| Uc | 108 |
| Uc | 118 |
| Uc | 128 |
| Uc | 110 |
| Uc | 121 |
| Uc | 113 |
| Uc | 89  |
| Uc | 135 |
| Uc | 83  |

## VI. Expression Data

### Analysis of Variance

| Source          | Type III SS | df | Mean Squares | F-Ratio | p-Value |
|-----------------|-------------|----|--------------|---------|---------|
| <b>TT\$</b>     | 0.373       | 1  | 0.373        | 6.001   | 0.024   |
| <b>GRP</b>      | 0.809       | 4  | 0.202        | 3.253   | 0.033   |
| <b>TT\$*GRP</b> | 0.954       | 4  | 0.239        | 3.837   | 0.018   |
| <b>Error</b>    | 1.244       | 20 | 0.062        |         |         |

| Standard Effect | Trt | group | _trt | _group | Estimate | Error  | DF | t     | Pr     |
|-----------------|-----|-------|------|--------|----------|--------|----|-------|--------|
| trt*group       | Col | 1     | ler  | 1      | -0.4293  | 0.2036 | 20 | -2.11 | 0.0478 |
| trt*group       | Col | 2     | ler  | 2      | 0.2133   | 0.2036 | 20 | 1.05  | 0.3073 |
| trt*group       | Col | 3     | ler  | 3      | 0.4053   | 0.2036 | 20 | 1.99  | 0.0604 |
| trt*group       | Col | 4     | ler  | 4      | 0.2867   | 0.2036 | 20 | 1.41  | 0.1745 |
| trt*group       | Col | 5     | ler  | 5      | 0.6393   | 0.2036 | 20 | 3.14  | 0.0052 |

## Normality Plot

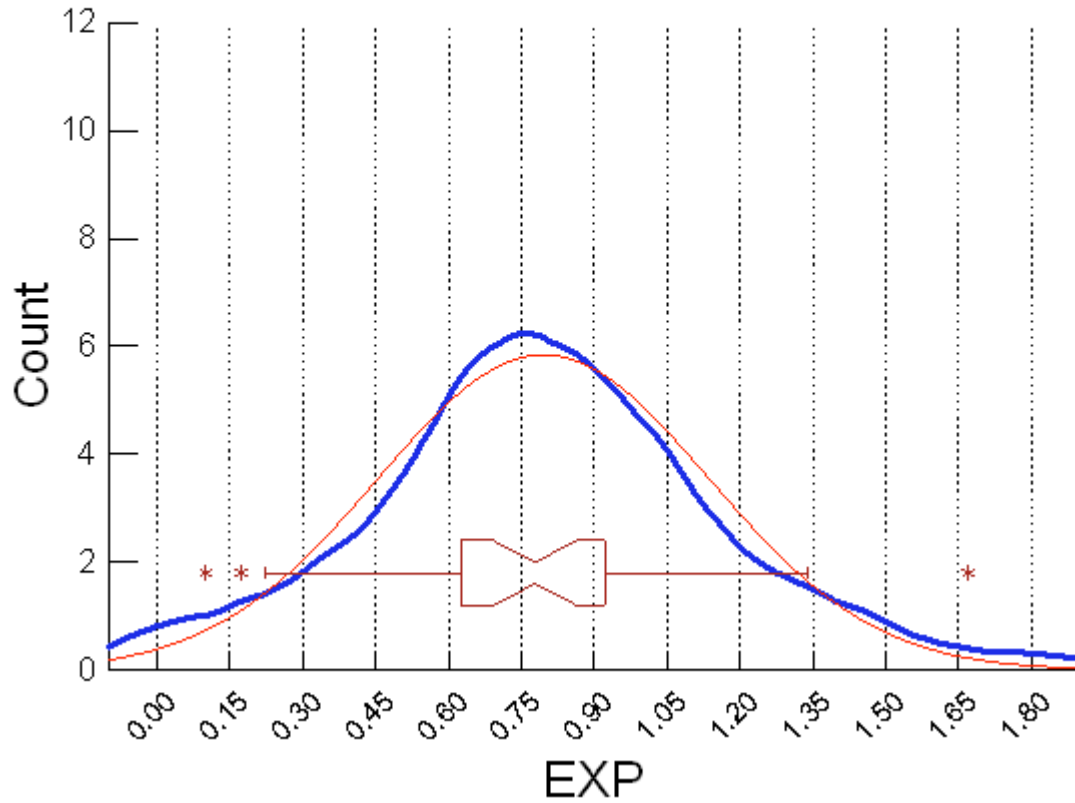

\* Data normally distributed with a sqrt transformation with homogeneity of variances (Levene's Test .686,  $p=0.608$ ).

| Treatment | Expression | Group |
|-----------|------------|-------|
| col       | 0.1        | 1     |
| col       | 0.566      | 1     |
| col       | 0.458      | 1     |
| col       | 0.656      | 2     |
| col       | 0.755      | 2     |
| col       | 0.819      | 2     |
| col       | 1.208      | 3     |
| col       | 1.175      | 3     |
| col       | 1.342      | 3     |
| col       | 1.261      | 4     |
| col       | 0.775      | 4     |
| col       | 0.917      | 4     |
| col       | 1.054      | 5     |
| col       | 0.849      | 5     |
| col       | 1.67       | 5     |
| ler       | 0.922      | 1     |



|     |       |   |
|-----|-------|---|
| ler | 0.624 | 1 |
| ler | 0.866 | 1 |
| ler | 0.742 | 2 |
| ler | 0.624 | 2 |
| ler | 0.224 | 2 |
| ler | 0.877 | 3 |
| ler | 1.049 | 3 |
| ler | 0.583 | 3 |
| ler | 0.781 | 4 |
| ler | 0.843 | 4 |
| ler | 0.469 | 4 |
| ler | 0.768 | 5 |
| ler | 0.714 | 5 |
| ler | 0.173 | 5 |

**File S2**  
**Combined Phenotypic Genotypic data**

Available for download as a CSV file at  
[http://www.genetics.org/lookup/suppl/doi: 10.1534/genetics.113.154351 /-/DC1](http://www.genetics.org/lookup/suppl/doi:10.1534/genetics.113.154351/-/DC1)
